# Supplementary material for: B chromosome contains active genes and impacts the transcription of A chromosomes in maize (Zea mays L.)
Source: PubMed Central journal article supplement (PMC4833949; doi:10.1186/s12870-016-0775-7), 2016-04-16
Supplement: 12870_2016_775_MOESM10_ESM.pdf [file 12870_2016_775_MOESM10_ESM.pdf]

## Index

|                                                                                              |    |
|----------------------------------------------------------------------------------------------|----|
| Multiple_Sequence_Alignment of GRMZM2G013761 and GRMZM2G013761B.....                         | 1  |
| Predicted coding sequence and protein sequence of GRMZM2G013761B base on GRMZM2G013761 ..... | 8  |
| Multiple_Sequence_Alignment of GRMZM2G356718 and GRMZM2G356718B.....                         | 9  |
| Predicted coding sequence and protein sequence of GRMZM2G356718B base on GRMZM2G356718.....  | 17 |
| Multiple_Sequence_Alignment of AF466202.2_FG007 and AF466202.2_FG007B .....                  | 17 |
| Predicted coding sequence sequence of AF466202.2_FG007B base on AF466202.2_FG007 .....       | 24 |
| Multiple_Sequence_Alignment GRMZM2G356653 and Grmzm2g356653B .....                           | 25 |
| Predicted coding sequence and protein sequence of GRMZM2G356653B base on GRMZM2G356653.....  | 31 |

Multiple sequence alignment of four B-chromosome genes, the exons A-genome homologue are shown in red character, and the variation sites are highlighted.

### Multiple\_Sequence\_Alignment of GRMZM2G013761 and GRMZM2G013761B

|                |                                          |     |
|----------------|------------------------------------------|-----|
| GRMZM2G013761  | TCTTCTCAAGCTCTAGCCGAACTCCCTCACGCCATCCTC  | 40  |
| GRMZM2G013761B | -----                                    | 40  |
| GRMZM2G013761  | TTTCTTGGTGTTCATCCCTGCGGCAACCACCACTTGGGCG | 80  |
| GRMZM2G013761B | -----                                    | 80  |
| GRMZM2G013761  | CTCCTCTCCCTGCCCTCCCATGGCGGCTCCCCCTGGATC  | 120 |
| GRMZM2G013761B | -----                                    | 120 |
| GRMZM2G013761  | CCTCCCTGCGCGCCCTCTCCCGTGGATGGTGCCGCCCC   | 160 |
| GRMZM2G013761B | -----t-----a-----                        | 160 |
| GRMZM2G013761  | TTCTTGCAGCACGTCTGCTCCCTCCCTGGCGCCCTCGT   | 200 |
| GRMZM2G013761B | -----                                    | 200 |
| GRMZM2G013761  | CCCCAACGCCGAAATGCCGCTGCTGCTCCACCAGCCGCT  | 240 |
| GRMZM2G013761B | -----                                    | 240 |
| GRMZM2G013761  | ACTGCTCTGAACGCCAGTGCCGACCACCATCTCCATGG   | 280 |
| GRMZM2G013761B | -----                                    | 279 |
| GRMZM2G013761  | CGCAGGAGCTCCCCAATCTCCTCTTGCCAGGGCGCCGTCG | 320 |
| GRMZM2G013761B | -----                                    | 319 |
| GRMZM2G013761  | CTGAGCTCGCCCTGCCCCAGCCATGGACGCCGTCGGGCCA | 360 |
| GRMZM2G013761B | -----                                    | 359 |

|                |                                           |      |
|----------------|-------------------------------------------|------|
| GRMZM2G013761  | CCCGTCTCCTATCTCCCCTCGCCCTCATCCTCTGGCTGCT  | 400  |
| GRMZM2G013761B | -----                                     | 399  |
| GRMZM2G013761  | GCCCCCTCCTATTCCCTGGTGGCTGAGTCTTCTTCCATGGA | 440  |
| GRMZM2G013761B | -----                                     | 439  |
| GRMZM2G013761  | TGCTGGCTGTGCTGCCCTCCCTGGTGTCTCACCTCTGCCCC | 480  |
| GRMZM2G013761B | -----                                     | 479  |
| GRMZM2G013761  | CTGCGTTGGATGGCCGGTTGCTCCTGCCCTAGGTTTGTCA  | 520  |
| GRMZM2G013761B | -----                                     | 519  |
| GRMZM2G013761  | AGCCTAACTCTCTCCATCTATCCCCTGCTCGAATCTTGC   | 560  |
| GRMZM2G013761B | ---c-----a-----                           | 559  |
| GRMZM2G013761  | TGATTGGCCCTGCGCAGATTATCCTCATGCCCGGCCGCGG  | 600  |
| GRMZM2G013761B | -----                                     | 599  |
| GRMZM2G013761  | TACAACAGCAACAGCCATGAAACCCCATCGTGTGCGGCC   | 640  |
| GRMZM2G013761B | -----                                     | 639  |
| GRMZM2G013761  | TCGACGTGTTCGACCGAATATCGCAGCACGTGCCACCCG   | 680  |
| GRMZM2G013761B | -----a-----a-----                         | 679  |
| GRMZM2G013761  | ATCTGCAGCCCTGGTTGCGAGGACGTCGAACCCCGGTGAG  | 720  |
| GRMZM2G013761B | -----                                     | 719  |
| GRMZM2G013761  | CCCCTCGCTAGTAGCCTATTGTTTTCCGCATCCCTAGTGC  | 760  |
| GRMZM2G013761B | -----                                     | 759  |
| GRMZM2G013761  | TTGATAAAATGTTGAACCGTTGTGTGTCGTTAACCGCAGC  | 800  |
| GRMZM2G013761B | -----                                     | 799  |
| GRMZM2G013761  | TACCGTCGACGTTGTGCCTCGCGCTTACCAATGCGATGA   | 840  |
| GRMZM2G013761B | -----                                     | 839  |
| GRMZM2G013761  | AATGTCTGAGCGAATAGACGCCATGCGACCCGAGTTTGAT  | 880  |
| GRMZM2G013761B | -----a-----                               | 879  |
| GRMZM2G013761  | TCTGCCAGGTTGTTTGATGTGTATTTTACTCATTGTGATT  | 920  |
| GRMZM2G013761B | -----                                     | 919  |
| GRMZM2G013761  | TAGTTGATG...TGTTTGTATGTGCGAGGTGATGAGAAAA  | 957  |
| GRMZM2G013761B | -----atg-----                             | 959  |
| GRMZM2G013761  | ATAAAGGAGATGCGTCGTTTCGATAATAAAGATTAAGTTAA | 997  |
| GRMZM2G013761B | -----                                     | 999  |
| GRMZM2G013761  | AATGTAGTTTATGGTGTGAAGAGTGT...CGATAAATATGT | 1035 |
| GRMZM2G013761B | -----gt-----                              | 1039 |
| GRMZM2G013761  | ATGCCATTGTGTGATATGGCATAAGTTAGAATTAAGGCCA  | 1075 |
| GRMZM2G013761B | -----                                     | 1079 |
| GRMZM2G013761  | GTATGTATTGTATTATGAAACTAATTAGAGATATGCATGA  | 1115 |
| GRMZM2G013761B | -----                                     | 1119 |

|                |                                           |      |
|----------------|-------------------------------------------|------|
| GRMZM2G013761  | TGCTTGTAAGTGGATTGTACGCAGAGTACTTTGGTAAGGG  | 1155 |
| GRMZM2G013761B | -----                                     | 1159 |
| GRMZM2G013761  | TATTTCTCAAGTATAAATGATTTGGTTATTGTATATGAAT  | 1195 |
| GRMZM2G013761B | -----                                     | 1199 |
| GRMZM2G013761  | TGAGTGATCAAGTTAATAATGTAAAAACAACGTTTAGTAC  | 1235 |
| GRMZM2G013761B | -----                                     | 1239 |
| GRMZM2G013761  | TTATAGCGCTTTGCCGACAAGATTTATTGGTGGTTGAGTG  | 1275 |
| GRMZM2G013761B | -----                                     | 1279 |
| GRMZM2G013761  | AATTTCTAATGTATGGTGACATGAATGCCTTGTTGTATTA  | 1315 |
| GRMZM2G013761B | -----                                     | 1319 |
| GRMZM2G013761  | TGTGGTTTTAGTTCTACTAAAGATAAAGTGTGAGTGTTTC  | 1355 |
| GRMZM2G013761B | -----                                     | 1359 |
| GRMZM2G013761  | TAAATGTTAAAAGCATGATAAGTGTAGAAGTTAAATAAGA  | 1395 |
| GRMZM2G013761B | -----                                     | 1399 |
| GRMZM2G013761  | TCTAAGTTAGAGTTCTTGCTGTTTGGACTGCATGTCCAAT  | 1435 |
| GRMZM2G013761B | -----                                     | 1439 |
| GRMZM2G013761  | TTTATGACGTGGCTAGTTAAGTAAAGTAAACCGTGTTTTC  | 1475 |
| GRMZM2G013761B | -----t-----                               | 1479 |
| GRMZM2G013761  | TGTAGAAATGTAATATATAAACTTGTAGATAATCTTTTT   | 1515 |
| GRMZM2G013761B | -----t-----                               | 1519 |
| GRMZM2G013761  | ATCTTTCTTGTGTAAAAATTGCATGACCATAGGTTTCAGTA | 1555 |
| GRMZM2G013761B | -----g-----t-----                         | 1559 |
| GRMZM2G013761  | GTTTAGGAGTTATGATTTTTCCAAGTCCAGTTTCAGAATC  | 1595 |
| GRMZM2G013761B | -----                                     | 1599 |
| GRMZM2G013761  | TGTCCAGATTCTGTACTGATTTCGAAAATGACCTTGTTTG  | 1635 |
| GRMZM2G013761B | -----                                     | 1639 |
| GRMZM2G013761  | TCCAAGTTAAACTGAGAATTAGCTCTTAGTAATTATAGGA  | 1675 |
| GRMZM2G013761B | -----                                     | 1679 |
| GRMZM2G013761  | TAATTGTAGTACTTTTCTTAAGCTTTCCAACAAATTTTGG  | 1715 |
| GRMZM2G013761B | g-----                                    | 1719 |
| GRMZM2G013761  | ATCACCTTTTTGGTGATCTATAAATTAAGTTACAGCTGT   | 1755 |
| GRMZM2G013761B | -----                                     | 1759 |
| GRMZM2G013761  | TTGAGTTAGTATCTCTGAATCTATCCAAATCTGGACAGCA  | 1795 |
| GRMZM2G013761B | -----g-----                               | 1799 |
| GRMZM2G013761  | ATGTTTGTGTGATTAAGTACTTCGATACACATTGAATC    | 1835 |
| GRMZM2G013761B | -----                                     | 1839 |
| GRMZM2G013761  | ACTTTGAGATGATTATAAATGAATTATAGACAATTCTATT  | 1875 |
| GRMZM2G013761B | -----                                     | 1879 |

|                |                                                            |      |
|----------------|------------------------------------------------------------|------|
| GRMZM2G013761  | AGCTTTCTAAAAAGTCTAGGATCACCTGATTTGGATTTAT                   | 1915 |
| GRMZM2G013761B | -----                                                      | 1919 |
| GRMZM2G013761  | GAAACTCCAGTTATGGATTTTTGAAGTGAAGAGCCGAATT                   | 1955 |
| GRMZM2G013761B | -----                                                      | 1959 |
| GRMZM2G013761  | CTGTC <b>C</b> AAATCTGGACAGAATTAAAGTTTAGCACTGTTTG          | 1995 |
| GRMZM2G013761B | -----t-----                                                | 1999 |
| GRMZM2G013761  | ACCATTCAAACGTGTGAATCATGTTGTGATGATAATATAA                   | 2035 |
| GRMZM2G013761B | -----                                                      | 2039 |
| GRMZM2G013761  | GAGTTATAG <b>GACAAGTTTGGGAGCCACAAAACCGGAGAGG</b>           | 2075 |
| GRMZM2G013761B | -----                                                      | 2048 |
| GRMZM2G013761  | <b>ATTCCAGAGGCTAAATTCTCCTTCTTATTTAAAATTGAAT</b>            | 2115 |
| GRMZM2G013761B | .....                                                      | 2048 |
| GRMZM2G013761  | <b>AAAAAAGGGAATTTATCCTCTCCAATCCTCTCCGGGTTTA</b>            | 2155 |
| GRMZM2G013761B | .....                                                      | 2048 |
| GRMZM2G013761  | <b>TAGCTCCCAAAC TAGCTCATAG</b> AGGACTTTCTAAGCTTTC          | 2195 |
| GRMZM2G013761B | .....-----                                                 | 2066 |
| GRMZM2G013761  | CAGAAAGTCCTAGTTTACTATTTTTGGATGCATATTTTGT                   | 2235 |
| GRMZM2G013761B | -----                                                      | 2106 |
| GRMZM2G013761  | GAGTTATGAATAAAACAATTAATCGTT <b>A</b> TGCTG <b>T</b> TGTCTA | 2275 |
| GRMZM2G013761B | -----g-----c-----                                          | 2146 |
| GRMZM2G013761  | CATGTTTTTGTGCATGTCCGAGAAC <b>G</b> GTTGCTCGACTTCT          | 2315 |
| GRMZM2G013761B | -----a-----                                                | 2186 |
| GRMZM2G013761  | TCATGAATGAGGTGATAGACATTAGTGGATCATGCAGGGT                   | 2355 |
| GRMZM2G013761B | -----                                                      | 2226 |
| GRMZM2G013761  | TGAGGGTGCTTCATATAACTAAATCTAGCATGGCTTCCTA                   | 2395 |
| GRMZM2G013761B | -----                                                      | 2266 |
| GRMZM2G013761  | GGTAAGATGTTACATTCATATAACCTTTTACATCATATGC                   | 2435 |
| GRMZM2G013761B | -----                                                      | 2306 |
| GRMZM2G013761  | CACATTGTGAGGTGTTTCATCTGTGTCTAACTAATAATTAT                  | 2475 |
| GRMZM2G013761B | -----                                                      | 2346 |
| GRMZM2G013761  | TGTGTT <b>C</b> TCCTATTTGTTGTACAGGAAAAGATGGAATGGC          | 2515 |
| GRMZM2G013761B | -----t-----                                                | 2386 |
| GRMZM2G013761  | CACACCAGTGTGAGACTTGATTTTCATATATATTTAGTTA                   | 2555 |
| GRMZM2G013761B | -----                                                      | 2426 |
| GRMZM2G013761  | GGCACAACGATAGCGCAAACAGTTGAT <b>T</b> ACCAAATTTGTC          | 2595 |
| GRMZM2G013761B | -----g-----                                                | 2466 |
| GRMZM2G013761  | AATTAGTATTTTAGTTTGGATATAGAGTA <b>T</b> GCTTATGCAT          | 2635 |
| GRMZM2G013761B | -----c-----                                                | 2506 |

|                |                                                   |      |
|----------------|---------------------------------------------------|------|
| GRMZM2G013761  | GAGCTATTTACAAATGTTTATTTATGAGATATATAATGGT          | 2675 |
| GRMZM2G013761B | -----                                             | 2546 |
| GRMZM2G013761  | AATTTAGAATGATATCATCCTACTTTCATATATTTGATGG          | 2715 |
| GRMZM2G013761B | -----                                             | 2586 |
| GRMZM2G013761  | ACATCACATATGCATCTAGATTTTTCTCCAAGTTT <b>T</b> AGCA | 2755 |
| GRMZM2G013761B | -----c-----                                       | 2626 |
| GRMZM2G013761  | TGTAGTACATAGGACTAGGTGTCGATCCGGATTGTGGC <b>GC</b>  | 2795 |
| GRMZM2G013761B | -----a-                                           | 2666 |
| GRMZM2G013761  | CCGACGAGGTGGGGGC <b>C</b> TCGTTTGAGAGGGCCGATGAGGT | 2835 |
| GRMZM2G013761B | -----a-----                                       | 2706 |
| GRMZM2G013761  | GATCTTCGAGGAG.....                                | 2848 |
| GRMZM2G013761B | -----gaggaagatgatggacagacaacgagg                  | 2746 |
| GRMZM2G013761  | .....                                             | 2848 |
| GRMZM2G013761B | acacaccccgaagaccctcacctatcactagcggcgtgg           | 2786 |
| GRMZM2G013761  | .....                                             | 2848 |
| GRMZM2G013761B | agagtggcagggaaatcctcattttttgtactgacggtacg         | 2826 |
| GRMZM2G013761  | .....                                             | 2848 |
| GRMZM2G013761B | atatacaacaggtatgtactgtctttgattgtgctttcgt          | 2866 |
| GRMZM2G013761  | .....                                             | 2848 |
| GRMZM2G013761B | ttaaaaggtagttttgtcagttcacattaccctgcaactt          | 2906 |
| GRMZM2G013761  | .....                                             | 2848 |
| GRMZM2G013761B | attaattactatatctgttgaaaggagttgtctattatct          | 2946 |
| GRMZM2G013761  | .....                                             | 2848 |
| GRMZM2G013761B | gcaacttcacacagcagttcaatacagacaagacaaaaaa          | 2986 |
| GRMZM2G013761  | .....                                             | 2848 |
| GRMZM2G013761B | aaactaaacaaagcattggcaaaggtgacctaccacaaaa          | 3026 |
| GRMZM2G013761  | .....                                             | 2848 |
| GRMZM2G013761B | aatatattcttaacagacaataagattatctcaggctctg          | 3066 |
| GRMZM2G013761  | .....                                             | 2848 |
| GRMZM2G013761B | ttcatcctactaacattttatcttagacatataaccgctacg        | 3106 |
| GRMZM2G013761  | .....                                             | 2848 |
| GRMZM2G013761B | cttgtaattactactagtttccttgactactaattttct           | 3146 |
| GRMZM2G013761  | .....                                             | 2848 |
| GRMZM2G013761B | tctcatctctgtttcgttactgcacaggggaacttggtac          | 3186 |
| GRMZM2G013761  | .....                                             | 2848 |
| GRMZM2G013761B | agaaccagccaagctgcaagttgaagaaatccaagccaa           | 3226 |
| GRMZM2G013761  | .....                                             | 2848 |
| GRMZM2G013761B | gctgaacaggatcttatacagaaccagcagctcccggcca          | 3266 |

|                |                                           |      |
|----------------|-------------------------------------------|------|
| GRMZM2G013761  | .....                                     | 2848 |
| GRMZM2G013761B | tggagaaagagaagcaatccggttcctgaatgctcgctcca | 3306 |
| GRMZM2G013761  | .....                                     | 2848 |
| GRMZM2G013761B | aaaaaagtgttagttctggatgcctcaactcagcagattg  | 3346 |
| GRMZM2G013761  | .....                                     | 2848 |
| GRMZM2G013761B | gatgaatggacctgccaggccaaactttgaggcagcattt  | 3386 |
| GRMZM2G013761  | .....AGCTTACAGTGAAGGAGACATTCAGGTTT        | 2877 |
| GRMZM2G013761B | gggctgaggag-----                          | 3426 |
| GRMZM2G013761  | GAATGATAAGCATCTCCTTTTCTCCTGTACTGTTCTATTG  | 2917 |
| GRMZM2G013761B | -----                                     | 3466 |
| GRMZM2G013761  | TAACAAGGAAGTTGCTATCCTACTCGTCATGGGGAAAAGA  | 2957 |
| GRMZM2G013761B | -----                                     | 3506 |
| GRMZM2G013761  | GCGCACTTACAGCGTAAAAGTCTTTTCTTTAACAAGGAAG  | 2997 |
| GRMZM2G013761B | -----                                     | 3546 |
| GRMZM2G013761  | TTGCGTTACCCTTTTTTTTTATTAGGTCATTACTTTAGCTG | 3037 |
| GRMZM2G013761B | -----                                     | 3586 |
| GRMZM2G013761  | ATCCATGCCTTTCTATTCTGCACAGTATTCTGTTTTCTTT  | 3077 |
| GRMZM2G013761B | -----                                     | 3626 |
| GRMZM2G013761  | CAAGTTGGCTGCTTTTGTATGCAAGACAAGATAGTGGTAC  | 3117 |
| GRMZM2G013761B | -----                                     | 3666 |
| GRMZM2G013761  | ATGTGTTGTGCGGATTCTGTGTTGAAGGCATGAATGCGAA  | 3157 |
| GRMZM2G013761B | -----                                     | 3706 |
| GRMZM2G013761  | AATCTGGTAGATGCTTATTAATTTGCTAGGCACTTAGCGT  | 3197 |
| GRMZM2G013761B | -----a-                                   | 3746 |
| GRMZM2G013761  | TTCCAATTTTGACAGAACCTTGGAGCCAACACGCCTCGAC  | 3237 |
| GRMZM2G013761B | -----                                     | 3786 |
| GRMZM2G013761  | CAGCAGCAAATGTTTCTGTGACCATCAGTGACCTCAATAC  | 3277 |
| GRMZM2G013761B | -----a-t-----                             | 3826 |
| GRMZM2G013761  | TGTGTTGATTTGCTAGTTTCTACATCCCTCTACAGAGAT   | 3317 |
| GRMZM2G013761B | -----a-----                               | 3866 |
| GRMZM2G013761  | CATTGCTTTCAGCACTTTAAAATCACATTTTACTTTGTGT  | 3357 |
| GRMZM2G013761B | -----                                     | 3906 |
| GRMZM2G013761  | TATTTTCTTGAGAACGTGTTTCATTTATAGTACTTATGTA  | 3397 |
| GRMZM2G013761B | -----                                     | 3946 |
| GRMZM2G013761  | GCCTGACAGGCTCCAGTTTACCTGTAGCATCTGAAATTC   | 3437 |
| GRMZM2G013761B | -----                                     | 3986 |
| GRMZM2G013761  | CTCTGCCCAAACCGACTAAAAGAAGCAGAAAACCCAGCAT  | 3477 |
| GRMZM2G013761B | -----t-----                               | 4026 |

|                |                                                             |      |
|----------------|-------------------------------------------------------------|------|
| GRMZM2G013761  | GTGAATAAATACCTTGTCA <b>C</b> AGATCTTCATACTCATCGCT           | 3517 |
| GRMZM2G013761B | -----t-----                                                 | 4066 |
| GRMZM2G013761  | AGAATTTCTGATATGAAAATTGTATGGTAGTTCCTAGAAA                    | 3557 |
| GRMZM2G013761B | -----                                                       | 4106 |
| GRMZM2G013761  | TTGCTATATAATCTGCTGCTCTGACCTGAGAAATTAGTAT                    | 3597 |
| GRMZM2G013761B | -----                                                       | 4146 |
| GRMZM2G013761  | AGGGGTAATC <b>T</b> ATGTATTAGCGAAAGAGCTACTATGCTCT           | 3637 |
| GRMZM2G013761B | -----g-----                                                 | 4186 |
| GRMZM2G013761  | CAGATATAATAAAA <b>A</b> AGGAACTA <b>T</b> TGTTGAGAAATTTAAGT | 3677 |
| GRMZM2G013761B | -----t-----c-----                                           | 4226 |
| GRMZM2G013761  | TTATGTATTTGACTACTATCAGCTATAGTGCAATGTGCAA                    | 3717 |
| GRMZM2G013761B | -----                                                       | 4266 |
| GRMZM2G013761  | GTAATAATATAAGCTATTCTGCAGTAATAATTTTTTCTTT                    | 3757 |
| GRMZM2G013761B | -----                                                       | 4306 |
| GRMZM2G013761  | CCATCTAACTTGAACTGCTGACAGATATGAAATGAGGTTG                    | 3797 |
| GRMZM2G013761B | -----                                                       | 4346 |
| GRMZM2G013761  | AGATATTA <b>C</b> AAGGGCAGCTTTTTCCACGAGACCTCGCCTT           | 3837 |
| GRMZM2G013761B | -----t-----                                                 | 4386 |
| GRMZM2G013761  | GCATGGAGATGTAGCGCAAGACTGTATATTTCTGGTTTGA                    | 3877 |
| GRMZM2G013761B | -----                                                       | 4426 |
| GRMZM2G013761  | TTCCTGGATCCCGTGCCTTGCATGGAGATGTAGCGCAAGC                    | 3917 |
| GRMZM2G013761B | -----                                                       | 4466 |
| GRMZM2G013761  | GCAGCGTGAAGTATGTGAATTCTTCTTCGATTTAATAACC                    | 3957 |
| GRMZM2G013761B | -----                                                       | 4506 |
| GRMZM2G013761  | TTGGCAATCATTTGATTTTCAG <b>GTAATACTGGTGTGCTG</b>             | 3997 |
| GRMZM2G013761B | -----                                                       | 4546 |
| GRMZM2G013761  | <b>TCATGCTTTATGAGCCAGATATAAGCACAGTGCAGCAG</b>               | 4037 |
| GRMZM2G013761B | -----                                                       | 4586 |
| GRMZM2G013761  | <b>ACTAGAAAGGGAGCCTGGGGTTAAATTTAAGCATATCTCT</b>             | 4077 |
| GRMZM2G013761B | -----                                                       | 4626 |
| GRMZM2G013761  | <b>GCGCCACAACCT</b> <b>T</b> ACTGATGTAGCACAATCTGCTGGCAGTG   | 4117 |
| GRMZM2G013761B | -----c-----                                                 | 4666 |
| GRMZM2G013761  | <b>AAGCTGCAGATGCCATTGCGAGTGTGTCAGACAGGTAAGA</b>             | 4157 |
| GRMZM2G013761B | -----                                                       | 4706 |
| GRMZM2G013761  | TATTTCCATCATCATTTTGGGACAATCATGTTTCTTTTGT                    | 4197 |
| GRMZM2G013761B | -----                                                       | 4746 |
| GRMZM2G013761  | TTATTGATTTGTCATTAAGAATGTGGATGTGTGTCGTGCA                    | 4237 |
| GRMZM2G013761B | -----                                                       | 4786 |

|                |       |                                          |      |
|----------------|-------|------------------------------------------|------|
| GRMZM2G013761  | G     | TGTTATTCCATCTTCAGGCAGCAAGCAGAGCAGTTGCT   | 4277 |
| GRMZM2G013761B | ----- | -----                                    | 4826 |
| GRMZM2G013761  | A     | AAGCTCTTCCAGTCTGTCTGCAGCTGACTTGCTTG      | 4317 |
| GRMZM2G013761B | ----- | -----c-----                              | 4866 |
| GRMZM2G013761  | G     | GCACTTGCGAAGGCAGTTGTAA                   | 4357 |
| GRMZM2G013761B | ----- | -----t-----                              | 4906 |
| GRMZM2G013761  | T     | TTTTCCAGGTTTTTGCTCTGTTCTAGATATTGGCAG     | 4397 |
| GRMZM2G013761B | ----- | -----                                    | 4946 |
| GRMZM2G013761  | A     | ACTAACAGAAATATGTGTCTTAGGGTTACACGGACATA   | 4437 |
| GRMZM2G013761B | ----- | -----                                    | 4986 |
| GRMZM2G013761  | A     | AGAAAAGATCATTTGTTATCTT                   | 4477 |
| GRMZM2G013761B | ----- | -----c-----                              | 5026 |
| GRMZM2G013761  | A     | CTACATCTTCAAACCTGGCAGACCGATGTGGTCACCTGGG | 4517 |
| GRMZM2G013761B | ----- | -----                                    | 5066 |
| GRMZM2G013761  | T     | TAAGTGACTGATAAATTTGTGCTTCTGGTTCATGAGTGTT | 4557 |
| GRMZM2G013761B | ----- | -----g-----                              | 5106 |
| GRMZM2G013761  | T     | GATTAAATGGAAATCCTTCTCTGCCTGTAG           | 4597 |
| GRMZM2G013761B | ----- | -----                                    | 5146 |
| GRMZM2G013761  | A     | AACATTC                                  | 4637 |
| GRMZM2G013761B | ----- | -----t-----a-----                        | 5186 |
| GRMZM2G013761  | T     | TTGTTCCCATTTGGTGTT                       | 4677 |
| GRMZM2G013761B | ----- | -----a-----                              | 5226 |
| GRMZM2G013761  | C     | GTGGTCATGGTGACCGGCGGGAGGAACACCGGGTGTGTA  | 4717 |
| GRMZM2G013761B | ----- | -----c-----                              | 5266 |
| GRMZM2G013761  | G     | GAGTGATCAAGAACTGGGAGAAGCACAAAGGGCATCTTCG | 4757 |
| GRMZM2G013761B | ----- | -----                                    | 5306 |
| GRMZM2G013761  | A     | GGTCATCGACGTGCT                          | 4797 |
| GRMZM2G013761B | ----- | -----g-----                              | 5346 |
| GRMZM2G013761  | C     | CTAGTTTTCTCCTATTTGTTGTACAG               | 4837 |
| GRMZM2G013761B | ----- | -----a-----                              | 5386 |
| GRMZM2G013761  | G     | AATTCAAATTTGGTGGTCCATAAAAGTGTGGAGA       | 4871 |
| GRMZM2G013761B | ----- | -----                                    | 5420 |

## Predicted coding sequence and protein sequence of GRMZM2G013761B base on

### GRMZM2G013761

>GRMZM2G013761B\_coding\_sequence

ATGGCGGCTCCCCCTGGATCCCTCCCTGTGCGGACCTCTCCCGTGGATGGTGCCGCCCTTCTGCAGCACGTC



GTGCTCCCTCCCTGGCGCCCTCGTCCCCAACGCCGAAATGCCGCTGCTGCTCCACCAGCCGCTACTGCTCCTG  
AACGCCAGTGCCGACCACCATCTCCATGGCGCAGGAGCTCCCCAATCTCCTCTTGCCAGGGCGCCGCTGCTGAG  
CTCGCCCTGCCCCAGCCATGGACGCCGTCGGGCCACCCGTCTCCTATCTCCCCTCGCCCTCATCTCTGGCTGCTG  
CCCCCTCTATTCTGTTGGCTGAGTCTTCTCCATGGATGCTGGCTGTGCTGCCCTCCCTGGTGCTCACCTCTGC  
CCCCTGCGTTGGATGGCCGTTGCTCCTGCCCTAGTTTTGTCAAGCCCTAACTCTACTCCATCTATCCCTGCTCGA  
ATCTTGCTGATTGGCCCTGCGCAGATTATCCTCATGCCGCGCCGCGGTACAACAGCAACAGCCATGAAACCCCAT  
CGTGTGCGCCCTCGACGTGTTGACAGAATATCGCAGCACGTGCCAACCCGATCTGCAGCCCTGGTTGCGAGG  
ACGTGCAACCCCGTACCGTTCGACGTTGTGCCTCGCGCTTACCAATGCGATGAAATGTCTGAGCGAATAGACGA  
CATGCGACCCGAGTTTGATTCTGCCAGTTGTTGATGTGATTTTACTCATTGTGATTTAGTTGATGATGTTTG  
TATGTAATACTGGTGTGCTGTCATGCTTTATGAGCCCAGATATAAGCACAGTGTGAGCAGACTAGAAAGGGAGC  
CTGGGGTTAAATTAAGCATATCTGCGCCACAACCCACTGATGTAGCACAATCTGCTGGCAGTGAAGCTGCAG  
ATGCCATTGCGAGTGTGTCAGACAGTGTATTCTATCTTCAGGCAGCAAGCAGAGCAGTTGCTAAGCTCTCCA  
GTCTGTCTGCAGCTGACTTGCTTGCCAAAGCACTTGCGAAGGCAGTTTTGGAATAACAGAAATATGTGTCTTAG  
GGTTACACGGACATAAAGAAAAGATCATTGTTATCTTCTTGAGGATTACAGTACACTACATCTTCAAAGTGGCA  
GACCGATGTGGTCACTGGGTTTGTATAACATTCTGGTGATCGTGTTCCTCATCGTCAGGGTCATATTTGTTCC  
ATTGGTGTATCTTCAAGTTTACGTGCGCAACGTGGTTCATGGTGACCGGCGGGAGGAACACCGGGCGTGTAGG  
AGTGATCAAGAACTGGGAGAAGCACAAGGGCATCTTCGAGGAAAACATAAAATGGAATTCAAATTTGGTGGTC  
CTAAAAGTGTGGAGA

>GRMZM2G013761B\_Predicted\_protein

MAAPPGSLPVRTLSRGWCRPFLQHVVLPPLAPSSPTPEMPLLLHQPLLLLNASADHHLHGAGAPQSPFLARAPSLSSPCP  
SHGRRRATRLLSPLALILWLLPLPIPGG\*VFFHGCWLCCPPWCSPLPPALDGRLLLP\*VCQALTLHLHSLLESC\*LALR  
RLSSCPAAVQQQP\*NPIVSRPRRVRQNIARANPICSPGEDVEPRYRRRCASRFTNAMKCLSE\*TTCDPSLILPGCL  
MCILLIVI\*LMMCLYVILVLLSFCFMSPDISTVSAD\*KGSLGLNLSISLRHNPLM\*HLLAVKQLMPLRVCQTVLFLSSG  
SKQSSC\*ALPVCLQLTCLPKHLRRQFVN\*QKYVS\*GYTDIKKRSLLSSLEDYSTLHLQTRPMWSPGFATIFW\*SCFFI  
VRVIFVPIGVI FSLTSATWSW\*PAGGTPGV\*E\*SRTGRSTRASSRKT\*NGIQIWW\* KCGX

**Multiple\_Sequence\_Alignment of GRMZM2G356718 and GRMZM2G356718B**

|                |                                           |     |
|----------------|-------------------------------------------|-----|
| GRMZM2G356718  | ATGAACTTCAACCCTCGCACTACTTCGTCAAGGAGGTGGT  | 40  |
| GRMZM2G356718B | -----                                     | 40  |
| GRMZM2G356718  | CAAAGGCATCAACGAGAGCGACCTCCAAGGCTCCACTAGA  | 80  |
| GRMZM2G356718B | -----a-----                               | 80  |
| GRMZM2G356718  | CGTGGATCAAAGTCTTCGCCACGCACAACGCCACGAGCG   | 120 |
| GRMZM2G356718B | -----                                     | 120 |
| GRMZM2G356718  | CATCACCAGCTCGAGAACATGTGCTGGCGGATCTGGCAC   | 160 |
| GRMZM2G356718B | -----                                     | 160 |
| GRMZM2G356718  | CTCACTCACAAGAAGCAGGTCAGGATTTTCGCACGTCTCTT | 200 |
| GRMZM2G356718B | -----g-----                               | 200 |
| GRMZM2G356718  | TCGTGGTTATGATCTCTCGCTGCTTGTCTATTTTGTAA    | 240 |
| GRMZM2G356718B | -----                                     | 240 |
| GRMZM2G356718  | TAATCTTGCTCGCCTCTCGATTTCATGTTTTGTATCAGTTT | 280 |
| GRMZM2G356718B | -----                                     | 280 |
| GRMZM2G356718  | GATCTCTATTTTAATTTGATCTCTGTTTTAGTTTGATCTT  | 320 |
| GRMZM2G356718B | -----a-----                               | 320 |

|                |                                           |      |
|----------------|-------------------------------------------|------|
| GRMZM2G356718  | TGTTTAGTTTGATTTTTAAGTGTCTCTGTTTACTGAATG   | 360  |
| GRMZM2G356718B | -----g-----                               | 359  |
| GRMZM2G356718  | GAGATGCATGATTAATGAAGCGCACACTGCACAACGAGTA  | 400  |
| GRMZM2G356718B | -----                                     | 399  |
| GRMZM2G356718  | CAATCTA...TACTACACCATAAGGAACTATCGAGGGCGT  | 437  |
| GRMZM2G356718B | -----tac-----                             | 439  |
| GRMZM2G356718  | CAATCTCCATCCGGGTACATCTCTACAACCTCACAATCAT  | 477  |
| GRMZM2G356718B | -----g-----g-----                         | 479  |
| GRMZM2G356718  | CAATTTGGTACTGCTATTTTTTTTGTATGGTGTAGGGTT   | 517  |
| GRMZM2G356718B | -----g-----                               | 519  |
| GRMZM2G356718  | TCATCATTGACAGTTTGTGTAATGCTTTATCAGTGTACAC  | 557  |
| GRMZM2G356718B | -----                                     | 559  |
| GRMZM2G356718  | TAAATCTGCTACTATTTTCGAGAATAATTGTAAAAGTTGAA | 597  |
| GRMZM2G356718B | -----                                     | 599  |
| GRMZM2G356718  | GCAAGTTCTATGTTCCCTCCATTTGACTAAAACCTAAC    | 637  |
| GRMZM2G356718B | -----                                     | 639  |
| GRMZM2G356718  | ACCCTTGGCCTTTTTTATCAGTGCCTTTAGAACCTTCCAGT | 677  |
| GRMZM2G356718B | -----                                     | 679  |
| GRMZM2G356718  | GGTATTTGTTTGAGGGGATTTCTGCTTGTATTCAATAA    | 717  |
| GRMZM2G356718B | -----                                     | 719  |
| GRMZM2G356718  | ATGGTTTAGGGTCTCATAATTATAAAAACCTTTATATGG   | 757  |
| GRMZM2G356718B | -----                                     | 759  |
| GRMZM2G356718  | TGAAATGTGATTTCCCTGTTTCGTGAAACGAGCAGTGCATT | 797  |
| GRMZM2G356718B | -----t-----                               | 799  |
| GRMZM2G356718  | TTTGTAGTAAGCGAATACATAATGTAGTTCTGCTCATGGG  | 837  |
| GRMZM2G356718B | -----                                     | 839  |
| GRMZM2G356718  | AGATGACCAAGTAGACATCGCTGCATTGGCAACCTGCAGG  | 877  |
| GRMZM2G356718B | -----c-----                               | 879  |
| GRMZM2G356718  | CTGTAGATGAAATGCCATGGCAGTAGCCCATTGATGGACT  | 917  |
| GRMZM2G356718B | -----c-----                               | 919  |
| GRMZM2G356718  | GACTGTGAACAATAATCCAAAGTTCGCACAGCATCCGTTC  | 957  |
| GRMZM2G356718B | -----a-----                               | 959  |
| GRMZM2G356718  | TCTCCCCTTACTGCTGTGCGAAACTGACCACCGAACCCCTA | 997  |
| GRMZM2G356718B | -----                                     | 999  |
| GRMZM2G356718  | AGTTTGTCTATTTGTATTCGGATCTGATCTAATTAGAAAT  | 1037 |
| GRMZM2G356718B | -----                                     | 1039 |
| GRMZM2G356718  | TTATATGTATACCTAATAAATTCGAATTTTCCTTTTCTTT  | 1077 |
| GRMZM2G356718B | -----                                     | 1079 |

|                |                                           |      |
|----------------|-------------------------------------------|------|
| GRMZM2G356718  | TTGCAAAAAGTTATTTGGGTGTACATGTGTACACCCATGTC | 1117 |
| GRMZM2G356718B | -----                                     | 1119 |
| GRMZM2G356718  | CTACACTGGGTCCGCCCCGAGCCTTCTGATCTTAACAG    | 1156 |
| GRMZM2G356718B | -----c-----                               | 1159 |
| GRMZM2G356718  | GAAACCTGGTTCGTTTTTGCAAACTATTTTTTGTATTTTT  | 1196 |
| GRMZM2G356718B | -----                                     | 1199 |
| GRMZM2G356718  | TCCAGACTCCCTGTTTATGACAGTTCTGGGTTTTGCCTGA  | 1236 |
| GRMZM2G356718B | -----                                     | 1239 |
| GRMZM2G356718  | TAGCATTTGCTCTGTATCTGATTTTCATAGCAAAAAATCAG | 1276 |
| GRMZM2G356718B | -----                                     | 1279 |
| GRMZM2G356718  | ACTCGACAATGGGCTGCGTGGACACACCAAGAGGAGGAGA  | 1316 |
| GRMZM2G356718B | -----...-----                             | 1316 |
| GRMZM2G356718  | TTTTTTTCAATGCGCTGCGGCAAGTAGGAAAAGTAAAGA   | 1354 |
| GRMZM2G356718B | -----aa-c-----                            | 1356 |
| GRMZM2G356718  | GGCAGTAAATTATGGATGCAATGCTCTTCTTCTATTTGTA  | 1394 |
| GRMZM2G356718B | -----                                     | 1396 |
| GRMZM2G356718  | ATCTAATTAGCAAATAATAATCGATTGATGGATAATCCCA  | 1434 |
| GRMZM2G356718B | -----                                     | 1436 |
| GRMZM2G356718  | TATTGTTTTCCAGAACTTTGACAAGATTACACACCGTGT   | 1474 |
| GRMZM2G356718B | -----                                     | 1476 |
| GRMZM2G356718  | TCAGAGTAAAAACAAGGATCAGGTATTTATTTCTCAACCA  | 1514 |
| GRMZM2G356718B | -----                                     | 1516 |
| GRMZM2G356718  | AGATGTTTGGATGAAACAAATACACATTAGGCTGTGAGCC  | 1554 |
| GRMZM2G356718B | -----                                     | 1556 |
| GRMZM2G356718  | TGTGAATTTTAGTTGTGTATGAGTTATCCAAAGGAGTTCA  | 1594 |
| GRMZM2G356718B | -----                                     | 1596 |
| GRMZM2G356718  | TCTTTCTATTGTGATTAGAGTTTATATTTTATATTACTAT  | 1634 |
| GRMZM2G356718B | -----t-----                               | 1636 |
| GRMZM2G356718  | TAAGATGTTTAATTTTTTCTTGCAACGTTAGCCTACCTTA  | 1674 |
| GRMZM2G356718B | -----                                     | 1676 |
| GRMZM2G356718  | TTAAAGTTAATTCTATTGTATATCAATCTAATATAAAAA   | 1714 |
| GRMZM2G356718B | -----g-----t-----                         | 1716 |
| GRMZM2G356718  | GATTTAATGCTTTATGTGCCATACAGGTCAGCCATTACTA  | 1754 |
| GRMZM2G356718B | -----                                     | 1756 |
| GRMZM2G356718  | TTATCGTCTTGTTTCGCGCATGAAGAAGCTACTGGGTCCT  | 1794 |
| GRMZM2G356718B | -----a-----                               | 1796 |
| GRMZM2G356718  | AGGTTCTCACTTGATGCAAAAACTCCAAGGACACCATTG   | 1834 |
| GRMZM2G356718B | -----                                     | 1836 |

|                |                                           |                                   |                         |      |
|----------------|-------------------------------------------|-----------------------------------|-------------------------|------|
| GRMZM2G356718  | CTGCTATGCTTCGCTG                          | GTAATTGAATATATTTTATCATCT          | 1874                    |      |
| GRMZM2G356718B | -----                                     | -----                             | 1876                    |      |
| GRMZM2G356718  | GTAAATTGCCTGAGAAAATATAGTTCATTGTTGATTTTAT  |                                   | 1914                    |      |
| GRMZM2G356718B | -----                                     | -----                             | 1916                    |      |
| GRMZM2G356718  | TCATAAACCATAGGACCAGTAAGACATTCTATGT        | A                                 | 1954                    |      |
| GRMZM2G356718B | -----                                     | t                                 | 1956                    |      |
| GRMZM2G356718  | CAATCTGCTAGCTCTTTTTAGGATCATTAGTTTTATCTTT  |                                   | 1994                    |      |
| GRMZM2G356718B | -----                                     | -----                             | 1996                    |      |
| GRMZM2G356718  | CATAGAGTGCCGCTTGCTGCTACTTATTACCATGAAGAAG  |                                   | 2034                    |      |
| GRMZM2G356718B | -----                                     | -----                             | 2036                    |      |
| GRMZM2G356718  | TTCCCTTAGTTTTTTAA                         | ACTGTCAGGAATTCTAAAATCTTA          | 2074                    |      |
| GRMZM2G356718B | -----                                     | g                                 | 2076                    |      |
| GRMZM2G356718  | CAGGAAGTTCACAGCCATTTAAAAGCCCGAAACACAAATG  |                                   | 2114                    |      |
| GRMZM2G356718B | -----                                     | -----                             | 2116                    |      |
| GRMZM2G356718  | CACACCCTTGCCAAAAACATCATCGGGACTTCTTTGGTCT  |                                   | 2154                    |      |
| GRMZM2G356718B | -----                                     | -----                             | 2156                    |      |
| GRMZM2G356718  | ACACCTTACTGCTGTGCGAAA                     | T                                 | 2194                    |      |
| GRMZM2G356718B | -----                                     | c                                 | 2196                    |      |
| GRMZM2G356718  | TTTGTCTATTTGTATTCGGATCTGATCTAATTAGAAATTT  |                                   | 2234                    |      |
| GRMZM2G356718B | -----                                     | -----                             | 2236                    |      |
| GRMZM2G356718  | ATATGTATACCTAATAAAATTCGAATTTTCCTTTTCTTTTT |                                   | 2274                    |      |
| GRMZM2G356718B | -----                                     | -----                             | 2276                    |      |
| GRMZM2G356718  | GCAAAAAGTTATTGGGTGTACATGTGTACACCCATGTCCT  |                                   | 2314                    |      |
| GRMZM2G356718B | -----                                     | -----                             | 2316                    |      |
| GRMZM2G356718  | ACA                                       | TGGGTCCGCCCC                      | GAGCCTTCTGATCTTAACAGGAA | 2354 |
| GRMZM2G356718B | ---c                                      | -----                             | t                       | 2356 |
| GRMZM2G356718  | ACCTGGTTCGTTTTTGC                         | AACTATTTTTTGTATTTTT               | TCC                     | 2394 |
| GRMZM2G356718B | -----                                     | -----                             | c-a                     | 2396 |
| GRMZM2G356718  | AGA...                                    | CTCCCTGTTTATGACAGTTCTGGGTTTTGCCTG |                         | 2430 |
| GRMZM2G356718B | gactacc                                   | -----                             | -----                   | 2436 |
| GRMZM2G356718  | ATAGCATTTGCTCTGTATCTGATTTCATAG            | CAAAAAATCA                        |                         | 2470 |
| GRMZM2G356718B | -----                                     | -----                             | -----                   | 2476 |
| GRMZM2G356718  | GACTCGACAATGGGCTGCGTGGACACACCAAGAGGAGGAG  |                                   | 2510                    |      |
| GRMZM2G356718B | -----                                     | -----                             | -----                   | 2516 |
| GRMZM2G356718  | ATTTTTTTCAATGCGCTGCGGCAAGTAGGAAA          | AGTAAGAG                          |                         | 2550 |
| GRMZM2G356718B | -----                                     | -----                             | -----                   | 2556 |
| GRMZM2G356718  | GCAGTAAATTATGGATGCAATGCTCTTCTTCTATTTGTAA  |                                   | 2590                    |      |
| GRMZM2G356718B | -----                                     | -----                             | -----                   | 2596 |

|                |                                          |      |
|----------------|------------------------------------------|------|
| GRMZM2G356718  | TCTAATTAGCAAATAATAATCGATTGATGGATAATCCCAT | 2630 |
| GRMZM2G356718B | -----                                    | 2636 |
| GRMZM2G356718  | ATTGTTTTCAGAACTTTGACAAGATTACACACCGTGT    | 2670 |
| GRMZM2G356718B | -----c-----a-----                        | 2675 |
| GRMZM2G356718  | TCAGAGTAAAAACAAGGATCAGGTATTTATTTCTCAACCA | 2710 |
| GRMZM2G356718B | -----.....                               | 2691 |
| GRMZM2G356718  | AGATGTTTGGATGAAACAAATACACATTAGGCTGTGAGCC | 2750 |
| GRMZM2G356718B | -----                                    | 2696 |
| GRMZM2G356718  | TGTGAATTTTAGTTGTGTATGAGTTATCCAAAGGAGTTCA | 2790 |
| GRMZM2G356718B | -----                                    | 2736 |
| GRMZM2G356718  | TGTTTCTATTGTGATTAGAGTTTATATTTTATATTACTAT | 2830 |
| GRMZM2G356718B | -----                                    | 2776 |
| GRMZM2G356718  | TAAGATGTTTAATTTTTCTTGCAACGTTAGCCTACCTTA  | 2870 |
| GRMZM2G356718B | -----t-----                              | 2816 |
| GRMZM2G356718  | TTAAAGTTTAATCTGTGTATATCAATCTAATATAAAAA   | 2910 |
| GRMZM2G356718B | -----                                    | 2856 |
| GRMZM2G356718  | GATTTAATGCTTTATGTGCCATACAGGTCAGCCATTACTA | 2950 |
| GRMZM2G356718B | -----                                    | 2896 |
| GRMZM2G356718  | TTATCGTCTTGTTCGACGCATGAAGAAGCTACTGGGTCCT | 2990 |
| GRMZM2G356718B | -----g-----                              | 2936 |
| GRMZM2G356718  | AGGTTCTCACTTGATGCAAAAACTCCAAGGACACCATTG  | 3030 |
| GRMZM2G356718B | -----                                    | 2976 |
| GRMZM2G356718  | CTGCTATGCTTCGCTGGTAATTGAATATATTTTATCATCT | 3070 |
| GRMZM2G356718B | -----                                    | 3016 |
| GRMZM2G356718  | GTAAATGCGCTGAGAAAATATAGTTCATTGTTGATTTTAT | 3110 |
| GRMZM2G356718B | -----                                    | 3056 |
| GRMZM2G356718  | TCATAAACCATAGGACCAGTAAGACATTCTATGTAGAAAT | 3150 |
| GRMZM2G356718B | -----                                    | 3096 |
| GRMZM2G356718  | CAATCTGCTAGCTCTTTTTAGGATCATTAGTTTTATCTTT | 3190 |
| GRMZM2G356718B | -----                                    | 3136 |
| GRMZM2G356718  | CATAGAGTGCCGCTTGCTGCTACTTATTACCATGAAGAAG | 3230 |
| GRMZM2G356718B | -----                                    | 3176 |
| GRMZM2G356718  | TTCCCTTAGCTTTTTAGCTGTCAGGAATTCTAAAATCTTA | 3270 |
| GRMZM2G356718B | -----t-----                              | 3216 |
| GRMZM2G356718  | CAGGAAGTTCACAGCCATTAAGCCCGAAAACACAAATG   | 3310 |
| GRMZM2G356718B | -----g-----                              | 3256 |
| GRMZM2G356718  | CACACCCTTGCCAAAACATCATCGGACTTCTTT.GTCT   | 3349 |
| GRMZM2G356718B | -----a-----g-----                        | 3296 |

|                |                                           |      |
|----------------|-------------------------------------------|------|
| GRMZM2G356718  | ACACAAAATATTTTATTATGTCCAAATTC AACAGTTGTGA | 3389 |
| GRMZM2G356718B | -----                                     | 3336 |
| GRMZM2G356718  | TATGCAAGTCCTGATCCCATGCAAAATGTTTGCAGGATAA  | 3429 |
| GRMZM2G356718B | -----                                     | 3376 |
| GRMZM2G356718  | ACGATGCCCCCGCCACCTAAGGATTTGGAGATTGCTATAG  | 3469 |
| GRMZM2G356718B | -----                                     | 3416 |
| GRMZM2G356718  | TGCAAGTAGAGTGTAGTGATCAATGGGTCCTGATAATGTT  | 3509 |
| GRMZM2G356718B | -----                                     | 3456 |
| GRMZM2G356718  | CAAAGGCTACAAGCATTAGCCGGGACATAGTCCAAGCCTG  | 3549 |
| GRMZM2G356718B | -----                                     | 3496 |
| GRMZM2G356718  | ATACAGGAAAAGTGTACGTGTCACTTAACGTTATGCCCA   | 3589 |
| GRMZM2G356718B | -----t-----                               | 3536 |
| GRMZM2G356718  | ACTTTGTTTTGTTTGTGCTATGAGTTGTATAACTATTTAA  | 3629 |
| GRMZM2G356718B | -----                                     | 3576 |
| GRMZM2G356718  | GCCCATCTTCAGTTTTTCCCAACTTCAGTTTCACTAGCAT  | 3669 |
| GRMZM2G356718B | -----g-----                               | 3616 |
| GRMZM2G356718  | TGTCTAGAACACGGTGTTCGATATACATGTTTTATACTAA  | 3709 |
| GRMZM2G356718B | -----g-----                               | 3656 |
| GRMZM2G356718  | ATTTTAACTTCAGTGGCAACGCACGGGCACATACCTATCA  | 3749 |
| GRMZM2G356718B | t-----                                    | 3696 |
| GRMZM2G356718  | ATTGATAACACATATGGATGTCAATTATACTTAAGCAAAC  | 3789 |
| GRMZM2G356718B | -----                                     | 3736 |
| GRMZM2G356718  | AAAAGGTATGCATCCCCATAAAATACATTTACTAAAAATT  | 3829 |
| GRMZM2G356718B | -----t-----                               | 3776 |
| GRMZM2G356718  | TGTAATTTACAATTAATATTTACTCTTATATCTTTGTTG   | 3869 |
| GRMZM2G356718B | -----                                     | 3816 |
| GRMZM2G356718  | CGACAGCAGCGAGCATACTTGAACTAAATTGATACTTGC   | 3909 |
| GRMZM2G356718B | -----                                     | 3856 |
| GRMZM2G356718  | TTCTCTCTTGATTCATGTGATTTAAGTTTAATAGTTATA   | 3949 |
| GRMZM2G356718B | -----g-----                               | 3896 |
| GRMZM2G356718  | CATTTGCGAGAGATCTACATGCCATGTGTTGTTTATATCA  | 3989 |
| GRMZM2G356718B | -----                                     | 3936 |
| GRMZM2G356718  | TGACAGTAAAATAATATTTTGTAAATGAAAATAATTCAAG  | 4029 |
| GRMZM2G356718B | -----                                     | 3976 |
| GRMZM2G356718  | CCTTCATTTCTGGGTGGCCATGTACACCTTGTTTATGGTG  | 4069 |
| GRMZM2G356718B | -----                                     | 4016 |
| GRMZM2G356718  | GGAGAATG.TCTTTGTTTTACATAAATGATGGGTGCTGG   | 4107 |
| GRMZM2G356718B | -----tc-----                              | 4056 |

|                |                                                            |      |
|----------------|------------------------------------------------------------|------|
| GRMZM2G356718  | TGGGGATGCCTATCTT <b>A</b> TTGTTGCGGGTCGGTGGCGTGAA          | 4147 |
| GRMZM2G356718B | ----- <b>g</b> -----                                       | 4096 |
| GRMZM2G356718  | GCCATGC <b>T</b> TGCGAACAGCTTGAAGGAC <b>C</b> AGTGGAAAAGAT | 4187 |
| GRMZM2G356718B | ----- <b>a</b> ----- <b>g</b> -----                        | 4136 |
| GRMZM2G356718  | CATTTTTATTATCTTAATGAAACTGTTTTGCGTGCACGAA                   | 4227 |
| GRMZM2G356718B | -----                                                      | 4176 |
| GRMZM2G356718  | AACAGTACCATGTATTTGGAAAAAACCTCCCT <b>A</b> TTTTAG           | 4267 |
| GRMZM2G356718B | ----- <b>g</b> -----                                       | 4216 |
| GRMZM2G356718  | CCATTTTCATCCTCCTCTTTTAGACTGAAAAATTCTAGGAT                  | 4307 |
| GRMZM2G356718B | -----                                                      | 4256 |
| GRMZM2G356718  | TATTATTGTCTGCCATCTTGATGTTTTATGTGATCTT <b>T</b> AG          | 4347 |
| GRMZM2G356718B | ----- <b>c</b> -----                                       | 4296 |
| GRMZM2G356718  | GAAAAATAGTGACTAATGGGACTAGAATGTG <b>C</b> TGGTTCAA          | 4387 |
| GRMZM2G356718B | ----- <b>t</b> -----                                       | 4336 |
| GRMZM2G356718  | AGTTTTGGCCTTGGTATCTTACTGGTTCAATGTGGCACTG                   | 4427 |
| GRMZM2G356718B | -----                                                      | 4376 |
| GRMZM2G356718  | CTAGCTATGTATGTGAAAGTCTTTAAAGATGGAAGAAGAA                   | 4467 |
| GRMZM2G356718B | -----                                                      | 4416 |
| GRMZM2G356718  | GTTGGCATGGATGGTTAGGGGAGACACTAAAGTTAAATGG                   | 4507 |
| GRMZM2G356718B | -----                                                      | 4456 |
| GRMZM2G356718  | TGCTAAAGTTTATCTAAAGCTAGCAATATCATCTACAGTT                   | 4547 |
| GRMZM2G356718B | -----                                                      | 4496 |
| GRMZM2G356718  | ATGACCTGGTAAGCTTGATGTGGGGCACCATGTGAAAAAC                   | 4587 |
| GRMZM2G356718B | -----                                                      | 4536 |
| GRMZM2G356718  | ATGTATTTCAATAAGTCTTGAATTCGAACTTTATGGTTTG                   | 4627 |
| GRMZM2G356718B | -----                                                      | 4576 |
| GRMZM2G356718  | GCAAAGTAGTAATGTCTACCTTTTCCTACTTT <b>C</b> TGCATGG          | 4667 |
| GRMZM2G356718B | ----- <b>a</b> -----                                       | 4616 |
| GRMZM2G356718  | AACTGGTAATTTGATTTTCAAGATAACTCAG <b>CTTGGAGTA</b>           | 4707 |
| GRMZM2G356718B | -----                                                      | 4656 |
| GRMZM2G356718  | <b>TTGGGCATTTGAGATGGTGGTTCCTAGCGGGATTTCTTTC</b>            | 4747 |
| GRMZM2G356718B | -----                                                      | 4696 |
| GRMZM2G356718  | <b>AGATCCAATACTAGAAAATTCAGTTTTGTTCAGTCAGGTAA</b>           | 4787 |
| GRMZM2G356718B | -----                                                      | 4736 |
| GRMZM2G356718  | GTAAGTGAAATTTGAATTGCCTTCT <b>C</b> CCTTTCAGTAATGC          | 4827 |
| GRMZM2G356718B | ----- <b>t</b> -----                                       | 4776 |
| GRMZM2G356718  | GAAATTCATTAACCTCAT <b>C</b> GATCTTTTAGATCTGATGTT           | 4867 |
| GRMZM2G356718B | ----- <b>t</b> -----                                       | 4816 |

|                |                                            |      |
|----------------|--------------------------------------------|------|
| GRMZM2G356718  | GTTCTGTAACATGACTGATCACTGTGTGGTTGCATTAGTT   | 4907 |
| GRMZM2G356718B | -----                                      | 4856 |
| GRMZM2G356718  | TTCTTTCTCATGTCTTGAGATAGTTGTGTCTTGTGCTTCA   | 4947 |
| GRMZM2G356718B | -----                                      | 4896 |
| GRMZM2G356718  | ATCATGCATCTCTACTACCTATTAAGAGGCAAGAGAGGGC   | 4987 |
| GRMZM2G356718B | -----                                      | 4936 |
| GRMZM2G356718  | GTCCACAAGCGACACCATAACAATAATCAATCATATTAGCA  | 5027 |
| GRMZM2G356718B | -----                                      | 4976 |
| GRMZM2G356718  | GACATGATTAATTATATTAAACTTCAATTCTTGTCTCATT   | 5067 |
| GRMZM2G356718B | -----                                      | 5016 |
| GRMZM2G356718  | GGTGCTCTCGTTTAAGTGTAGTAGTCCTTGTTAAATATAT   | 5107 |
| GRMZM2G356718B | -----                                      | 5056 |
| GRMZM2G356718  | TGCCATATTAGTAGACATGACTGCATCCCTAATCTTCTTTA  | 5147 |
| GRMZM2G356718B | -----c-----c-----                          | 5096 |
| GRMZM2G356718  | GCAAATTCATTCGCAGTAAGCTTGTGCTTATGCATGTT     | 5187 |
| GRMZM2G356718B | -----g-----                                | 5136 |
| GRMZM2G356718  | TATATTTGAGCAAATCATAATTTACTTGGAGCAACATATT   | 5227 |
| GRMZM2G356718B | -----                                      | 5176 |
| GRMZM2G356718  | TACCAGGACTTAAGAAGTGAGCACTACGACTTTGCAAAAG   | 5267 |
| GRMZM2G356718B | -----                                      | 5216 |
| GRMZM2G356718  | TGGTGATAATGATATATCGTAGATTGTCAGTGATGCAATG   | 5307 |
| GRMZM2G356718B | -----a-----                                | 5256 |
| GRMZM2G356718  | AGGTTGTTCCTCGAAGATGCTAATTCGCCCTCAAGCATCAC  | 5347 |
| GRMZM2G356718B | -----                                      | 5296 |
| GRMZM2G356718  | ATGAAAATGAAATATTTGCTAAATATGTTGAGGATTCAGT   | 5387 |
| GRMZM2G356718B | -----                                      | 5336 |
| GRMZM2G356718  | TCGCAAAGCTTTCTTGCACCGTAACCTTGCTCTTGCTGAT   | 5427 |
| GRMZM2G356718B | -----a-----                                | 5376 |
| GRMZM2G356718  | GTTTCAGTCATCAACCATTCTTCTAGTACAACAATACTGT   | 5467 |
| GRMZM2G356718B | -----g-----g-----                          | 5416 |
| GRMZM2G356718  | CATTCTTCTGGTACCACAACACTGATAGTATTGATCTATG   | 5507 |
| GRMZM2G356718B | -----                                      | 5456 |
| GRMZM2G356718  | GGAGGTAAGGTGATAATTTTAATGATTGTTTTAGTGTGTG   | 5547 |
| GRMZM2G356718B | -----                                      | 5496 |
| GRMZM2G356718  | GATTTAAACCATTCTGATATTTTCGTTTCATATGTTGTAGGC | 5587 |
| GRMZM2G356718B | -----                                      | 5536 |
| GRMZM2G356718  | AATTGTTAGTAGCAAATGCTGAGGATTATCGTACAGTCTTT  | 5627 |
| GRMZM2G356718B | -----t-----c-----                          | 5576 |



|                |                                          |      |
|----------------|------------------------------------------|------|
| GRMZM2G356718  | GTGTAGGAAAGGAATAGCAGTGGATATGTCAAAGGATCAT | 5667 |
| GRMZM2G356718B | -----                                    | 5616 |
| GRMZM2G356718  | AGGCCGACATATGATGCAGAGCATCAAAGGGTCATTGAGT | 5707 |
| GRMZM2G356718B | -----                                    | 5656 |
| GRMZM2G356718  | GTGGTGGATACATCGAAGATGGCTACCTCAATGGCGTACT | 5747 |
| GRMZM2G356718B | -----                                    | 5696 |
| GRMZM2G356718  | GTCTATGACCCGGGCTTTAGGGGACTAG             | 5775 |
| GRMZM2G356718B | -----                                    | 5724 |

**Predicted coding sequence and protein sequence of GRMZM2G356718B base on**

**GRMZM2G356718**

>GRMZM2G356718B\_Coding\_sequence

ATGAACTCAACCTCGCACTACTTCGTCAAGGAGGTGGTCAAAGGCATCAACGAGAGCGACCTCCAAGGATCC  
 ACTAGACGTGGATCAAAGTCTTCGCCACGCACAACGCCACGAGCGCATACCAAGCTCGAGAACATGTGCTGG  
 CGGATCTGGCACCTCACTCGCAAGAAGCAGCAAAAAATCAGACTCGACAATGGGCTGCGTGGACACACCAAGA  
 GGAGATTTTTTCAATGCGCTGCGGCAAGTAGGAAAAAACTTTGACAAGATTACACACCGTGTTCAGAGTAAAA  
 ACAAGGATCAGGTCAGCCATTACTATTATCGTCTTGTTCGACGCATGAAGAAGCTACTGGGTCCTAGGTTCTCACT  
 TGATGCAAAAAACTCCAAGGACACCATTGCTGCTATGCTTCGCTGTTATTGGGTGTACATGTGTACACCCATGTCC  
 TACTGCGGTCGCCCTGAGCCTTCTGATCTTAACAGGAAACCTGCAAAAAATCAGACTCGACAATGGGCTGC  
 GTGGACACACCAAGAGGAGGAGATTTTTTCAATGCGCTGCGGCAAGTAGGAAAAAACTTTGACAAGATTACA  
 CACCATGTTTCAGAGTAAAAACAAGGAGCCTGTCAGCCATTACTATTATCGTCTTGTTCGGCGCATGAAGAAGCTA  
 CTGGGTCCTAGGTTCTCACTTGATGCAAAAAACTCCAAGGACACCATTGCTGCTATGCTTCGCTGCTTGGAGTATT  
 GGGCATTGAGATGGTGGTTCTAGCGGGATTTCTTTCAGATCCAATACTAGAAAATTCAGTTTTGTCAGTCAGAT  
 TGTCAGTGATGAAATGAGGTTGTTCTCGAAGATGCTAATCCCTCAAGCATCACATGAAAATGAAATATTTGCT  
 AAATATGTTGAGGATTCAGTTCGCAAAGCTTCTTGCACAGTAACCTTGCTCTTGCTGATGTTTCAGTCATCAACC  
 ATCTTCTGGTACAACAGTACTGTCATTCTTCTGGTACCACAACACTGATAGTATTGATCTATGGGAGGTAAGGCA  
 ATTGTTAGTAGCAAATGCTGAGGATTATCGTATAGTCTGTGTAGGAAAGGAATAGCAGTGGATATGTCAAAGGA  
 TCATAGGCCGACATATGATGCAGAGCATCAAAGGGTCATTGAGTGTGGTGGATACATCGAAGATGGCTACCTCAA  
 TGGCGTACTGTCTATGACCCGGGCTTTAGGGGACTAG

>GRMZM2G356718B\_Protein\_sequence

MNFNPRTTSSRRWSKASTRATSKDPLDQSLRHAQRRAHHQAREHVLADLAPHSQEAANKQTRQWAAWTH  
 QEEIFFNALRQVGKFNFDKITHRVQSKNKDQVSHYYRLVRRMKLLGPRFSLDAKNSKDTIAAMLRCYWVYMCTP  
 MSYTGSAPEPSDLNRKPAKNQTRQWAAWTHQEEIFFNALRQVGKFNFDKITHHVQSKNKEPVSHYYRLVRRMKK  
 LLGPRFSLDAKNSKDTIAAMLRCLEYWAFEMVVPSPGISFRSNTRKFSVSVQIVSDEMRLFLEDANSPQASHENEIFAK  
 YVEDSVRKAFLHNSLALADVSVINHSSGTTVLSFFWYHNTDSIDLWEVRQLLVANAEDYRIVLCRKGIAVDMSKDHR  
 PTYDAEHQRIECGGYIEDGYLNGVLSMTRALGD

**Multiple\_Sequence\_Alignment of AF466202.2\_FG007 and AF466202.2\_FG007B**

|                   |                                         |    |
|-------------------|-----------------------------------------|----|
| AF466202.2_FG007  | ...AGCATATGACTGGGTGAGGGCCGACTCCTTCGACTT | 36 |
| AF466202.2_FG007B | atgc-----g-----                         | 40 |
| AF466202.2_FG007  | CGGGACGACTGTCTCGCCCCCAGGTATCCATCCAGCTCC | 76 |
| AF466202.2_FG007B | -----                                   | 80 |

|                   |                                           |     |
|-------------------|-------------------------------------------|-----|
| AF466202.2_FG007  | TCCTCCTCCTCGCCGCCGCCCTCGATCCTGTCCTGGAT    | 116 |
| AF466202.2_FG007B | -----                                     | 120 |
| AF466202.2_FG007  | TGGAGTCTCACCCCTACCCCTCTAACAAAGTAACAATCTCA | 156 |
| AF466202.2_FG007B | -----                                     | 160 |
| AF466202.2_FG007  | TGATTTTGCGATTTTCGTGCAACGGGCACACTGCTGTTATC | 196 |
| AF466202.2_FG007B | -----                                     | 200 |
| AF466202.2_FG007  | ATTAGCAAGTCCAAGGTGGTCCGTCTTCGGCGGATTACCC  | 236 |
| AF466202.2_FG007B | -----                                     | 240 |
| AF466202.2_FG007  | GACAAGCGCTTCCTCGCTGATGTTTCCGTCTACGACGTAG  | 276 |
| AF466202.2_FG007B | -----                                     | 280 |
| AF466202.2_FG007  | GTAATATAATTCCTCTCCAATTCTCCGACTGTTTCGCTTGT | 316 |
| AF466202.2_FG007B | -----                                     | 320 |
| AF466202.2_FG007  | CGTGCCAATTTGCCTGCCACGTCTTCGAGCAATTTGTGC   | 356 |
| AF466202.2_FG007B | -----                                     | 360 |
| AF466202.2_FG007  | ACACGCTGCAACTCATCTTAAGGGTTATTAGATTGAGGGA  | 396 |
| AF466202.2_FG007B | -----                                     | 400 |
| AF466202.2_FG007  | CGTAGATTGCATTTACATGCTTGAGATTGTTATGGATGGG  | 436 |
| AF466202.2_FG007B | -----                                     | 440 |
| AF466202.2_FG007  | CTGATGGAGCATATGCATTGGAAGGAAGAAAGAGCTTGGC  | 476 |
| AF466202.2_FG007B | -----                                     | 480 |
| AF466202.2_FG007  | CTTACAAACTTTTGGATGCAACTTATGTTGCAGAGAATAA  | 516 |
| AF466202.2_FG007B | -----                                     | 520 |
| AF466202.2_FG007  | GCTATGGTACACACCTGAGTGCCTGGTAATGGGTCTGAAT  | 556 |
| AF466202.2_FG007B | -----                                     | 560 |
| AF466202.2_FG007  | GGGCAGGCCGGCCCAAGCCCAAGGGCTTTTCACATAGCTG  | 596 |
| AF466202.2_FG007B | -----                                     | 600 |
| AF466202.2_FG007  | TTGTCATTGACTGCAACATGTTTCATCTTTGGTGGCCGATC | 636 |
| AF466202.2_FG007B | -----                                     | 640 |
| AF466202.2_FG007  | TGGGGCAAGCGGTATGCAGTCCACCAGATCTGTTGGTCAA  | 676 |
| AF466202.2_FG007B | -----                                     | 680 |
| AF466202.2_FG007  | TCGAGCGTCAGGATTGTTAGCTTCTTAGTTTGGCGAACTA  | 716 |
| AF466202.2_FG007B | -----                                     | 720 |
| AF466202.2_FG007  | GGGGATGGGTTGGTCTGGGTGGATCTTGGGTTGCGGGTCT  | 756 |
| AF466202.2_FG007B | -----                                     | 760 |
| AF466202.2_FG007  | ACGGCCGAGCCGCATGATCTTTGATGCAATTTTCGTCTGAG | 796 |
| AF466202.2_FG007B | -----                                     | 800 |
| AF466202.2_FG007  | GATGCTGCTTGCATGAGTACACAGATTGTGCTTTTGTTC   | 836 |
| AF466202.2_FG007B | -----                                     | 840 |

|                   |                                            |      |
|-------------------|--------------------------------------------|------|
| AF466202.2_FG007  | TGAATCCACCTCACACAGTCCAATTTCTTGCAGTGAAAA    | 876  |
| AF466202.2_FG007B | -----                                      | 880  |
| AF466202.2_FG007  | GAAGTCCCATCCATCCATTTGCATTTTCATATTTGGTCGTA  | 916  |
| AF466202.2_FG007B | -----                                      | 920  |
| AF466202.2_FG007  | TGCTAAGCTATTAGCTATATCTTTGTTTGTCTATTATCTT   | 956  |
| AF466202.2_FG007B | -----                                      | 960  |
| AF466202.2_FG007  | TACCAGATTAGAGCAATTAGTATATCATTACCTTCTCTAT   | 996  |
| AF466202.2_FG007B | -----                                      | 1000 |
| AF466202.2_FG007  | TCACCCTTTTTTTTGTATTTCAGTTATGTATCAAATGCAGTT | 1036 |
| AF466202.2_FG007B | -----                                      | 1040 |
| AF466202.2_FG007  | TTGATATTTGATAGGAGAATGGTAGACCATTGCGAGGGCA   | 1076 |
| AF466202.2_FG007B | -----                                      | 1080 |
| AF466202.2_FG007  | GTGGAGGAGTTGGGCGACGTGGTCAGACGAAGGCAGGGCA   | 1116 |
| AF466202.2_FG007B | -----                                      | 1120 |
| AF466202.2_FG007  | AAGCCACGTCCAGTAGCCACGAGGCTGCATCGCGAGGGCG   | 1156 |
| AF466202.2_FG007B | -----                                      | 1160 |
| AF466202.2_FG007  | GTGGAGGAGCTGGGCGACGAGGTCAGACTAAGGCGAGGTG   | 1196 |
| AF466202.2_FG007B | -----                                      | 1200 |
| AF466202.2_FG007  | AAGAATCACTGTTGGGCTGCATCAGTCAGCACCTCTAAG    | 1236 |
| AF466202.2_FG007B | -----                                      | 1240 |
| AF466202.2_FG007  | GGAGGAGGATGCATATGATGCGTCAGCTTAAGAGCATCGC   | 1276 |
| AF466202.2_FG007B | -----                                      | 1280 |
| AF466202.2_FG007  | CTTCGGCTGCTCGTCAGTCTCCAATCCGGTGAGAGCTCCA   | 1316 |
| AF466202.2_FG007B | -----                                      | 1320 |
| AF466202.2_FG007  | ATTATCAGTCCATTCCACTGCTATTGGTGGTTTGGGTACC   | 1356 |
| AF466202.2_FG007B | -----                                      | 1360 |
| AF466202.2_FG007  | TGCATTGGGTGTTTTTTTAGATAGCAAACATTTTTTTTAGA  | 1396 |
| AF466202.2_FG007B | -----                                      | 1400 |
| AF466202.2_FG007  | TTGTCATAGGACTTGGACTTGTGAAAGCGCTAAGAAAAGA   | 1436 |
| AF466202.2_FG007B | -----                                      | 1440 |
| AF466202.2_FG007  | AGTAGATTGACTGAAACTTTTCTAATTTATTTAGTGCTC    | 1476 |
| AF466202.2_FG007B | -----                                      | 1480 |
| AF466202.2_FG007  | AATAATATTCCATACTGACGTTACATATTGTCTTTATTAA   | 1516 |
| AF466202.2_FG007B | -----                                      | 1520 |
| AF466202.2_FG007  | ATAAGAGGCGGTTTCATTATCTTGTCTTTATTAAATAAGAG  | 1556 |
| AF466202.2_FG007B | -----                                      | 1560 |
| AF466202.2_FG007  | GCGGTTCAATAAAAATTTTCAGTTACATTCTACTGTCTTGC  | 1596 |
| AF466202.2_FG007B | -----                                      | 1600 |

|                   |                                           |      |
|-------------------|-------------------------------------------|------|
| AF466202.2_FG007  | TAATATCTATTGTCCTTTATTAATTACAAGATTGGCGGACA | 1636 |
| AF466202.2_FG007B | -----                                     | 1640 |
| AF466202.2_FG007  | AAAAGGATTAACCAACCTTACTGGTATAATATGTTATTGA  | 1676 |
| AF466202.2_FG007B | -----                                     | 1680 |
| AF466202.2_FG007  | AAATTCCTATTTATGAAAGTAAGGTTGTTTAATATTATTA  | 1716 |
| AF466202.2_FG007B | -----                                     | 1720 |
| AF466202.2_FG007  | TTTCAGTAAATTCTATTTTCAGTTCGAGAACCTTTTTGCAC | 1756 |
| AF466202.2_FG007B | -----                                     | 1760 |
| AF466202.2_FG007  | ACCAACTGTTTTATTTATGTTTATATGTTATATAATAATA  | 1796 |
| AF466202.2_FG007B | -----                                     | 1800 |
| AF466202.2_FG007  | GAGTAGTAGAGATTTTGGTACTACCTAATTAGATGTTGAT  | 1836 |
| AF466202.2_FG007B | -----                                     | 1840 |
| AF466202.2_FG007  | GTTTACTCTATTTTCAGTTCAGAAATATTTTGCTGATCAG  | 1876 |
| AF466202.2_FG007B | -----                                     | 1880 |
| AF466202.2_FG007  | TAAAAAATCAAACATGATACTTTTCCATAAAAGGTTGTTT  | 1916 |
| AF466202.2_FG007B | -----                                     | 1920 |
| AF466202.2_FG007  | TCCTGTTCTATTTGTTGTACGTAATACATATATTTTGCCC  | 1956 |
| AF466202.2_FG007B | -----                                     | 1960 |
| AF466202.2_FG007  | AAGGTTAGCCCCCTGGTCTCGCGCGCCTGCGGCGGAGAT   | 1996 |
| AF466202.2_FG007B | -----                                     | 2000 |
| AF466202.2_FG007  | CGGTCCAAGTTTAGTCTCTAGCGTTTGGCTGATTAGTCGG  | 2036 |
| AF466202.2_FG007B | -----                                     | 2040 |
| AF466202.2_FG007  | TTGTGGTGCTCTTCTGCTTGTGTTGCTTCTAGGACAAATTG | 2076 |
| AF466202.2_FG007B | -----                                     | 2080 |
| AF466202.2_FG007  | CTGGACATGACCAGCGTTTCGCGCCTGTTCCCGATCACCG  | 2116 |
| AF466202.2_FG007B | -----                                     | 2120 |
| AF466202.2_FG007  | ACCGGCTGGGGTTGCTCGCCACGGGGATCGCAGGTGACCT  | 2156 |
| AF466202.2_FG007B | -----                                     | 2160 |
| AF466202.2_FG007  | CAGCAGTGCTTGCTTCTCATGTCATTTCTGCCAGAATGCT  | 2196 |
| AF466202.2_FG007B | -----                                     | 2200 |
| AF466202.2_FG007  | TTGCCGAATGTACCTAAATATATGAAGTCCTGGATTAGTG  | 2236 |
| AF466202.2_FG007B | -----                                     | 2240 |
| AF466202.2_FG007  | TCCTATCTTTGTTTTCTACATCATCCTCAACCTTTTCTTC  | 2276 |
| AF466202.2_FG007B | -----                                     | 2280 |
| AF466202.2_FG007  | CCTAATAATGTCATTTATTTTCTAAAATACATGATCTAGA  | 2316 |
| AF466202.2_FG007B | -----                                     | 2320 |
| AF466202.2_FG007  | GTTTAATGGTTGGAGCTCAATTTGTTTTTAGTGCCACAAA  | 2356 |
| AF466202.2_FG007B | -----                                     | 2360 |

|                   |                                            |      |
|-------------------|--------------------------------------------|------|
| AF466202.2_FG007  | CACTTTAAATGATAGGGTATTTTAATTTTCGGGGCACTATT  | 2396 |
| AF466202.2_FG007B | -----                                      | 2400 |
| AF466202.2_FG007  | TTGAGGCCCCCTCGTTGGAGATGCTCTTACGGTTTTTTGGGG | 2436 |
| AF466202.2_FG007B | -----                                      | 2440 |
| AF466202.2_FG007  | TGATGATGCCGGGGAGTTTTGGGGTAATGGTGTAATACCC   | 2476 |
| AF466202.2_FG007B | -----                                      | 2480 |
| AF466202.2_FG007  | ATGGCATAGCATGAGGGCGTTTGAAAATTTAAACTACTAG   | 2516 |
| AF466202.2_FG007B | -----                                      | 2520 |
| AF466202.2_FG007  | GTGTATCCTCAAAATTCTTCTATGAACCTTTTTAAATTGA   | 2556 |
| AF466202.2_FG007B | -----                                      | 2560 |
| AF466202.2_FG007  | GTTCTTTAGACTTGCATTTTGGTTGGTTGACACACCAACA   | 2596 |
| AF466202.2_FG007B | -----                                      | 2600 |
| AF466202.2_FG007  | TGCTGTAATCATATTCAATTTGATAATCTGAAACCTTTGG   | 2636 |
| AF466202.2_FG007B | -----                                      | 2640 |
| AF466202.2_FG007  | TCATACACAGCAGAGGGTCAATTCGACTGTCATCATTAAAC  | 2676 |
| AF466202.2_FG007B | -----                                      | 2680 |
| AF466202.2_FG007  | GCACACATATAATGCATTAATGCATCACATTGTAGAAGTT   | 2716 |
| AF466202.2_FG007B | -----                                      | 2720 |
| AF466202.2_FG007  | GGTCTAAATTCTAATGATCTGTTTGGTTTTACTGATTGAT   | 2756 |
| AF466202.2_FG007B | -----                                      | 2760 |
| AF466202.2_FG007  | GTGAGCTATTTCTGCCTTATGTTTCATGAGCATGGAATGCA  | 2796 |
| AF466202.2_FG007B | -----                                      | 2800 |
| AF466202.2_FG007  | TTATTGCTAGCTAAGCTTGACACCACTTCAAGCAAGGTGG   | 2836 |
| AF466202.2_FG007B | -----                                      | 2840 |
| AF466202.2_FG007  | CTCTGCCAGTTTATTACTTCTGTTTCTAATCACCATTGCA   | 2876 |
| AF466202.2_FG007B | -----                                      | 2880 |
| AF466202.2_FG007  | TCTGACCATTGGCTTGGTACCTTGTTAAACATTACACAAT   | 2916 |
| AF466202.2_FG007B | -----                                      | 2920 |
| AF466202.2_FG007  | TGCCATTAAATTTAACACCTGAAATGGTTTTAGAATTTTCT  | 2956 |
| AF466202.2_FG007B | -----                                      | 2960 |
| AF466202.2_FG007  | GTTCAAATTCGAACCAACTCGAATCACCATTACCAGTACT   | 2996 |
| AF466202.2_FG007B | -----                                      | 3000 |
| AF466202.2_FG007  | GCCACGTGGAGCACCAAAGATGGTAACATCAAAACATGAC   | 3036 |
| AF466202.2_FG007B | -----                                      | 3040 |
| AF466202.2_FG007  | ATAATAGTTATTTTTATTTGCATGCTTGTTTTAGAATGCC   | 3076 |
| AF466202.2_FG007B | -----                                      | 3080 |
| AF466202.2_FG007  | GATAATCATATTTTTCTTCTTCAATCATCATTACAGGTGA   | 3116 |
| AF466202.2_FG007B | -----                                      | 3120 |

|                   |                                           |      |
|-------------------|-------------------------------------------|------|
| AF466202.2_FG007  | GGGGAGATCATTGGCACATGAGGCAAGGAATCAAACGCA   | 3156 |
| AF466202.2_FG007B | -----                                     | 3160 |
| AF466202.2_FG007  | GAATTCGTTTCAATTGGGGATATGAAATGCCTCCTGATG   | 3196 |
| AF466202.2_FG007B | -----                                     | 3200 |
| AF466202.2_FG007  | TTTTGGCACAAATGGTAAAAAATGAGCTCAAGGAAATATAT | 3236 |
| AF466202.2_FG007B | -----                                     | 3240 |
| AF466202.2_FG007  | ATTATATCAGGACTTCAGACTGGCAGTGCCTATAATTGCT  | 3276 |
| AF466202.2_FG007B | -----                                     | 3280 |
| AF466202.2_FG007  | TGATGACATGAAAGCCGCAGATTCAGTTTCGGTATGTTAC  | 3316 |
| AF466202.2_FG007B | -----                                     | 3320 |
| AF466202.2_FG007  | AATTTTTAGAGCACTATGCTTAGCTACACTACTCAGTACT  | 3356 |
| AF466202.2_FG007B | -----                                     | 3360 |
| AF466202.2_FG007  | TACATATGAATGGAATACAGACACATGTATGGTGATGCTT  | 3396 |
| AF466202.2_FG007B | -----                                     | 3400 |
| AF466202.2_FG007  | CTAATTCTCTTTGAAACTGAAACTTCAGATGTGCCTATCT  | 3436 |
| AF466202.2_FG007B | -----                                     | 3440 |
| AF466202.2_FG007  | AAAGGTTTAGGCGTCCCTATTGGATTCAAAGGCTTTTGT   | 3476 |
| AF466202.2_FG007B | -----                                     | 3480 |
| AF466202.2_FG007  | GACAAGGTCTATCCATGTGTGTTTCTAAGTCTAAATTGTA  | 3516 |
| AF466202.2_FG007B | -----                                     | 3520 |
| AF466202.2_FG007  | GTGTTGTATTATTGCAAAATGAAAAGAACTGTATATTATA  | 3556 |
| AF466202.2_FG007B | -----                                     | 3560 |
| AF466202.2_FG007  | ATGGAAAATGAACAATACCTTCAGGCCAAAAAATCTTCGA  | 3596 |
| AF466202.2_FG007B | -----                                     | 3600 |
| AF466202.2_FG007  | AAGATCCTAGGTGGTGGAAATGAGGCAGGTTGGAGTTCTGT | 3636 |
| AF466202.2_FG007B | -----                                     | 3640 |
| AF466202.2_FG007  | GTGCTGGTGCTCATACTATGGGAAAGCTTGCTGGTGAG    | 3676 |
| AF466202.2_FG007B | -----                                     | 3680 |
| AF466202.2_FG007  | GATAGAAAGGCTAAAGTTGTGGCAGGTCTATTTTTTTCC   | 3716 |
| AF466202.2_FG007B | -----                                     | 3719 |
| AF466202.2_FG007  | TCTTTTCTAAAAATTTTAGAATTGGTTGTATGCTATTTAA  | 3756 |
| AF466202.2_FG007B | -----                                     | 3759 |
| AF466202.2_FG007  | GGCAAAATGTTTTTCTATTGTCTAAAAAATGATTTATTTT  | 3796 |
| AF466202.2_FG007B | -----                                     | 3799 |
| AF466202.2_FG007  | TTCCCAGAATATTTATTTTCTAGCTTTTTTATCATACTTAA | 3836 |
| AF466202.2_FG007B | -----                                     | 3839 |
| AF466202.2_FG007  | AACAAATCTTTGCTTGTCAATTTATTTACCGACAGCAATGT | 3876 |
| AF466202.2_FG007B | -----                                     | 3879 |

|                   |                                           |      |
|-------------------|-------------------------------------------|------|
| AF466202.2_FG007  | GCCATTGTACTGCAATTTGTGCCATTGTACTACAATTTGG  | 3916 |
| AF466202.2_FG007B | -----                                     | 3919 |
| AF466202.2_FG007  | TAGCTCAATCAATATTTTCAGCAATGTGCCATTGTACTGCA | 3956 |
| AF466202.2_FG007B | -----                                     | 3959 |
| AF466202.2_FG007  | ATTTGTTGCCATGACATTTTTAGGTCCCAACCAAAGACTG  | 3996 |
| AF466202.2_FG007B | -----                                     | 3999 |
| AF466202.2_FG007  | TATCCCTCTTTTGTCTGGTTGTTTCATGTGATATCTTTGCT | 4036 |
| AF466202.2_FG007B | -----                                     | 4039 |
| AF466202.2_FG007  | TGTCGTTGGATGTTGCCTTTTACATAGCCAAATGTTCCAA  | 4076 |
| AF466202.2_FG007B | -----                                     | 4079 |
| AF466202.2_FG007  | CTAATTTTCCAACATCTTGTCTACCTTTACCTGTTAGTTG  | 4116 |
| AF466202.2_FG007B | -----                                     | 4119 |
| AF466202.2_FG007  | TAGCTTGAAACCATGCTGTCTTTGATGTCAATGAGAACTT  | 4156 |
| AF466202.2_FG007B | -----                                     | 4159 |
| AF466202.2_FG007  | TGTTTGCAAATAGATGTCCACAAATTCTAACATATACTT   | 4196 |
| AF466202.2_FG007B | -----                                     | 4199 |
| AF466202.2_FG007  | TGGTGCTATCAAAGGGAGCCACAATAGTTGATATGGCTGT  | 4236 |
| AF466202.2_FG007B | -----                                     | 4239 |
| AF466202.2_FG007  | AATCGTCACACCAGCCAATGATTATGAGCTACCAGCTTCT  | 4276 |
| AF466202.2_FG007B | -----                                     | 4279 |
| AF466202.2_FG007  | GTTTTAGCTGCTCTTGAGGTATGATCAGAACCATACTATT  | 4316 |
| AF466202.2_FG007B | -----                                     | 4319 |
| AF466202.2_FG007  | TACATGTTACAACATGGTATTGCTATAGTTGTTGTACAGC  | 4356 |
| AF466202.2_FG007B | -----                                     | 4359 |
| AF466202.2_FG007  | GTTGTAACATTATTTTCATTTCTAGCCTAAAGACACAAAA  | 4396 |
| AF466202.2_FG007B | -----                                     | 4399 |
| AF466202.2_FG007  | CCTTATGCCCTTCAAAGGCCGAGGACATTGTTGGGACCA   | 4436 |
| AF466202.2_FG007B | -----                                     | 4439 |
| AF466202.2_FG007  | TGCTGGCAAAGGGATTTATCCTTGGTAGAGATGCACTGGA  | 4476 |
| AF466202.2_FG007B | -----                                     | 4479 |
| AF466202.2_FG007  | CAAAGCAAAGCTTTGGATGAAAAGCACCAGCTCACGTCA   | 4516 |
| AF466202.2_FG007B | -----                                     | 4519 |
| AF466202.2_FG007  | ACTGCCACAGCTAGAGTGTCCCTTTGACAAGAGAATAG    | 4556 |
| AF466202.2_FG007B | -----                                     | 4559 |
| AF466202.2_FG007  | GCCTAAGTGAGAAGATCAGTGTGGCACTTCAGTTGTAAA   | 4596 |
| AF466202.2_FG007B | -----                                     | 4599 |
| AF466202.2_FG007  | TGATAAAGTGAAGGAAATGGATCAGAAATACCAAGTCTCT  | 4636 |
| AF466202.2_FG007B | -----                                     | 4639 |

|                   |                                          |      |
|-------------------|------------------------------------------|------|
| AF466202.2_FG007  | GAGAAGACAAAGTCAGCGCTGGCAGCTGCTGAACAGAGTG | 4676 |
| AF466202.2_FG007B | -----                                    | 4679 |
| AF466202.2_FG007  | TCTTGACCGTTGGATCTGCTATCATGAAGAACATGTATGT | 4716 |
| AF466202.2_FG007B | -----                                    | 4719 |
| AF466202.2_FG007  | TCTCACCGGAGCAGCATGGGTAACCGGTGCTTTCAGCAAG | 4756 |
| AF466202.2_FG007B | -----                                    | 4759 |
| AF466202.2_FG007  | GTCACCAGTGTGCCAACGATGTTGGTGCAAAGGCTAAGG  | 4796 |
| AF466202.2_FG007B | -----                                    | 4799 |
| AF466202.2_FG007  | AGAAAATAGCAGTCGAGCAGGAGGACAAGAATGCCGAGGG | 4836 |
| AF466202.2_FG007B | -----                                    | 4839 |
| AF466202.2_FG007  | TGGGCCTGGACAAGCAAACATCTCAGAGATCCCTGCAGCA | 4876 |
| AF466202.2_FG007B | -----                                    | 4879 |
| AF466202.2_FG007  | CACAGGGAGTTGGACTGCGAATTCGCAAACATACATGTCT | 4916 |
| AF466202.2_FG007B | -----                                    | 4919 |
| AF466202.2_FG007  | CTGAAACCTCTGAAGATGTTCCCATGTCTTCCGTGACTGT | 4956 |
| AF466202.2_FG007B | -----                                    | 4959 |
| AF466202.2_FG007  | CCCCTGTTACAGATGAGGAGCCCAGCATGGCCACTCCAC  | 4996 |
| AF466202.2_FG007B | -----                                    | 4999 |
| AF466202.2_FG007  | CAGCTGAAGTTTCTAAAAAACCAGAAGCTGCACAGGGATT | 5036 |
| AF466202.2_FG007B | ----- . . . .                            | 5035 |
| AF466202.2_FG007  | AA                                       | 5038 |
| AF466202.2_FG007B | ..                                       | 5035 |

**Predicted coding sequence sequence of AF466202.2\_FG007B base on**

**AF466202.2\_FG007**

>AF466202.2\_FG007B\_coding\_sequence

CAAGTCCAAGGTGGTCCGCTTTCGGCGGATTCACCGACAAGCGCTTCCTCGCTGATGTTTCCGTCTACGACGTAG  
AGAATAAGCTATGGTACACACCTGAGTGCAGTGGTAATGGGTCGAATGGGCAGGCCGGCCCAAGCCCAAGGGC  
TTTTACATAGCTGTTGTCATTGACTGCAACATGTTTCATCTTTGGTGGCCGATCTGGGGCAAGCGGTGAGGGGAG  
ATCATTGGCACATGAGGCAAGGAATCAAAGTGCAGAATTCGTTTCAATTGGGGATATGAAATGCCTCCTGATGT  
TTTGGCACAATGGCCAAAAAATCTTCGAAAGATCCTAGGTGGTGGAAATGAGGCAGGTTGGAGTTCTGTGTGCTG  
GTGCTCATACTATGGGAAAGCTTGCTGGGAGCCACAATAGTTGATATGGCTGTAATCGTCACACCAGCCAATG  
ATTATGAGCTACCAGCTTCTGTTTTAGCTGCTCTTGAGCCTAAAGACACAAAACCTTATGCCCTTCAAAGGCCGA  
GGACATTGTTGGGACCATGCTGGCAAAGGGATTTATCCTTGGTAGAGATGCACTGGACAAAGCAAAGCTTTGG  
ATGAAAAGCACCAGCTCAGTCAACTGCCACAGCTAGAGTGTCTCTTTGACAAGAGAATAGGCCTAAGTGAG  
AAGATCAGTGTGGCACTTCAGTTGTAATGATAAAGTGAAGGAAATGGATCAGAAATACCAAGTCTCTGAGAA  
GACAAAGTCAGCGCTGGCAGCTGCTGAACAGAGTGTCTTGACCGTTGGATCTGCTATCATGAAGAACATGTATGT  
TCTCACCGGAGCAGCATGGGTAACCGGTGCTTTCAGCAAGGTCACCAAGTGTGCCAACGATGTTGGTGCAAAG  
GCTAAGGAGAAAATAGCAGTCGAGCAGGAGGACAAGAATGCCGAGGGTGGGCCTGGACAAGCAAACATCTCA  
GAGATCCCTGCAGCACACAGGGAGTTGGACTGCGAATTCGCAAACATACATGTCTCTGAAACCTCTGAAGATGT



TCCCATGTCTCCGTGACTGTCCGCTGTTACAGATGAGGAGCCCAGCATGGCCACTCCACCAGCTGAAGTTTCT  
AAAAAACCAGAAGCTGCACAGGGATTA

### Multiple\_Sequence\_Alignment GRMZM2G356653 and Grmzm2g356653B

|                |                                            |     |
|----------------|--------------------------------------------|-----|
| GRMZM2G356653  | GTTTTCCCTGGTAAAAGTGCATTTCCCTGTGGTTTGAGTTG  | 40  |
| Grmzm2g356653B | -----                                      | 40  |
| GRMZM2G356653  | AACTTATTCCTGATAATTGCTTCTTTTCTTATTAATGATT   | 80  |
| Grmzm2g356653B | -----                                      | 80  |
| GRMZM2G356653  | TTTTTCTTGTCAGGAACATCTCTGGTTATCTGGAGTTGGC   | 120 |
| Grmzm2g356653B | -----                                      | 120 |
| GRMZM2G356653  | GGTGGCCTTTTCATTCATGGTTGCCTGCACTCATCCGGGT   | 160 |
| Grmzm2g356653B | -----                                      | 160 |
| GRMZM2G356653  | TGTAGCAATATCGGTCTCCAGGTGTGTGGGGGAGGAATG    | 200 |
| Grmzm2g356653B | -----g---                                  | 200 |
| GRMZM2G356653  | GATGTTACTATTAGGGAAGTGGTGTTTAGCAAGCATGTTA   | 240 |
| Grmzm2g356653B | -----                                      | 240 |
| GRMZM2G356653  | ATTTACAGGTATATTTTCAACAGTGACATGTTATAACAATGT | 280 |
| Grmzm2g356653B | -----                                      | 280 |
| GRMZM2G356653  | ATAAGTTCTAGCAACTACCACTGCAAATGAAGATTTTTTTT  | 320 |
| Grmzm2g356653B | -----                                      | 320 |
| GRMZM2G356653  | AATTCAGTTTGGTATGCACCATTATAGATGTGCTCACTC    | 360 |
| Grmzm2g356653B | -----a-----                                | 360 |
| GRMZM2G356653  | TAGGGGTAGTTGCAATTCCTCAAATAGTTTGCTTAAAATGT  | 400 |
| Grmzm2g356653B | -----                                      | 400 |
| GRMZM2G356653  | GTGGCCAGGGCTAGGTCACCTCTCAAATAGTATTTTACATT  | 440 |
| Grmzm2g356653B | -----                                      | 440 |
| GRMZM2G356653  | AACTCTAGCTGCAAGAATGGTACTTTATAACATCCATTAGT  | 480 |
| Grmzm2g356653B | -----                                      | 480 |
| GRMZM2G356653  | TCGCCTAAAATGTGTGGGAATTATGTAGAGATGTGCCAAT   | 520 |
| Grmzm2g356653B | -----                                      | 520 |
| GRMZM2G356653  | ATATAAAATAAACTTTTAAGCTCAAACAACCCCTTTGATT   | 560 |
| Grmzm2g356653B | -----                                      | 560 |
| GRMZM2G356653  | GATGTGCCACTGCTGATGCAGTAGCGTTATTGTGCCAAAT   | 600 |
| Grmzm2g356653B | -----                                      | 600 |
| GRMZM2G356653  | GGATACATGAGGATTAGGATGCTAATCCAAAGTAGGTGCA   | 640 |
| Grmzm2g356653B | -----                                      | 640 |
| GRMZM2G356653  | CCCCATGATTAAGCTCCTATGTCCAGATATGTATATTACC   | 680 |
| Grmzm2g356653B | -----                                      | 680 |

|                |                                           |      |
|----------------|-------------------------------------------|------|
| GRMZM2G356653  | TATCAACAAATCTTGGCATCCAGGTTTAAACTCCTCCCGC  | 720  |
| Grmzm2g356653B | -----                                     | 720  |
| GRMZM2G356653  | TGCTCGCCGATGTAAAGGTACGCACCTGCTGTCGAACTAT  | 760  |
| Grmzm2g356653B | -----                                     | 760  |
| GRMZM2G356653  | GGCTCTAACTGATATAGCTTTTAGGCCCAATAACATCTAC  | 800  |
| Grmzm2g356653B | -----                                     | 800  |
| GRMZM2G356653  | CACTGCTTATCATGCCATTAAATTGTTTGATGAAATACCA  | 840  |
| Grmzm2g356653B | -----                                     | 840  |
| GRMZM2G356653  | ATATAATATAGTAATGTGGCATATATCAGTTCAGTTTGAG  | 880  |
| Grmzm2g356653B | -----                                     | 880  |
| GRMZM2G356653  | TTGTAGTTGTAACCTGAGAACATATGTTTTGTGTCTAATA  | 920  |
| Grmzm2g356653B | -----a-----                               | 920  |
| GRMZM2G356653  | AGTTATGAATTTTTGTTGTTGTTCTTCCCTTCTGCAAAAC  | 960  |
| Grmzm2g356653B | -----                                     | 960  |
| GRMZM2G356653  | TTCAGATCTCCTACCTCTGCGATTCTAAAAAGAAGATTCA  | 1000 |
| Grmzm2g356653B | -----                                     | 1000 |
| GRMZM2G356653  | GGTCCCATTGCCATAGTGGATCCGTTTCCACTGTAGCTA   | 1040 |
| Grmzm2g356653B | -----                                     | 1040 |
| GRMZM2G356653  | TTGTTTTTTGTTGTTCTCTGGCAAAAAAACTTAGCAAAT   | 1080 |
| Grmzm2g356653B | ---c-----                                 | 1080 |
| GRMZM2G356653  | GCTTATAGGAATAATGAGTTATCTTGGAAGATGATTACTT  | 1120 |
| Grmzm2g356653B | -----                                     | 1120 |
| GRMZM2G356653  | AGATAGGTGCATGTTTATTTTCAGAGCTTATTTCAACCATT | 1160 |
| Grmzm2g356653B | -----                                     | 1160 |
| GRMZM2G356653  | TAACTATGTGTCCAACCATTTTGGGCTGGTAACTTCTTTA  | 1200 |
| Grmzm2g356653B | -----                                     | 1200 |
| GRMZM2G356653  | TTGAACCAGTATTTTGTCAATTAATTTACTCTACTTCAAA  | 1240 |
| Grmzm2g356653B | -----                                     | 1240 |
| GRMZM2G356653  | AAACCTGACCTGGAAAAAACTACAGAGACTGAACAAGGGG  | 1280 |
| Grmzm2g356653B | -----                                     | 1280 |
| GRMZM2G356653  | TGGCGCAGGCTATTCTTCGTGGAAATATCGATTTTAAGCG  | 1320 |
| Grmzm2g356653B | -----                                     | 1320 |
| GRMZM2G356653  | CGAACCCGCCGCCAGCCGCCACCACGCTCTTCGCT       | 1360 |
| Grmzm2g356653B | -----                                     | 1360 |
| GRMZM2G356653  | AGCTCGCCCACCGCGCCGCCAGCCAGCCCATCGCGCT     | 1400 |
| Grmzm2g356653B | -----                                     | 1400 |
| GRMZM2G356653  | ACAGACGCGCTGCCGGTACCCTCTCCCTCTCGCCGGAA    | 1440 |
| Grmzm2g356653B | -----t-----                               | 1440 |

|                |                                           |      |
|----------------|-------------------------------------------|------|
| GRMZM2G356653  | GTTCTTGGGTAACCATCTCACTACAGGTAACCATCTCCCT  | 1480 |
| Grmzm2g356653B | -----                                     | 1480 |
| GRMZM2G356653  | CTCTGAGATAAAATGTTTAAACTTTTATTTAGGGTCCATAC | 1520 |
| Grmzm2g356653B | -----                                     | 1520 |
| GRMZM2G356653  | TTTTAAGTGTTTCGATCCCTTCAAATGCTACACTTCCAAGC | 1560 |
| Grmzm2g356653B | -----                                     | 1560 |
| GRMZM2G356653  | AATGCATAATGTATTAATGTGGGGTTGTGGGCGTTGGAAT  | 1600 |
| Grmzm2g356653B | -----                                     | 1600 |
| GRMZM2G356653  | GTGCATGTTGACTAGCTTTGATTAGCTTGTTCGATATACAT | 1640 |
| Grmzm2g356653B | -----                                     | 1640 |
| GRMZM2G356653  | ACTTAGCAATCTATTTTTTCTTCTCCTTTCAAATGCTATG  | 1680 |
| Grmzm2g356653B | -----                                     | 1680 |
| GRMZM2G356653  | CTATTGCTACTGCTGTTGGAGTGTACCATTTAACTTGATA  | 1720 |
| Grmzm2g356653B | -----                                     | 1720 |
| GRMZM2G356653  | TATGATTTAATAGATGCTTTGTGTGCATAAAATCGTCTACA | 1760 |
| Grmzm2g356653B | -----                                     | 1760 |
| GRMZM2G356653  | GTTACCATTTGGACTTTTTTAGCCATGTTTGAGAGATGTG  | 1800 |
| Grmzm2g356653B | -----                                     | 1800 |
| GRMZM2G356653  | ACGGAGTTTGGATTTCACTTAAAAATGCAGGTCCAGTTGG  | 1840 |
| Grmzm2g356653B | -----                                     | 1840 |
| GRMZM2G356653  | AATCGAATACTCTGTTTGCTGGCCTATGCTAATGAGTAAT  | 1880 |
| Grmzm2g356653B | -----                                     | 1880 |
| GRMZM2G356653  | CTATTTTCAGATTTGGATATGTGCAAGACACAATGGTTGCT | 1920 |
| Grmzm2g356653B | -----                                     | 1920 |
| GRMZM2G356653  | CAACGAACCAGGTGCCTAGCTCTCTTGAATTTTGGTGTA   | 1960 |
| Grmzm2g356653B | -----                                     | 1960 |
| GRMZM2G356653  | ATTTGAAGTCTACTGCTACTGTATTAGTCTCAGTTCTCTA  | 2000 |
| Grmzm2g356653B | -----                                     | 2000 |
| GRMZM2G356653  | TTGTTTGATTCCGCTTTTCTTCTCACGCGTGCAGCACCAG  | 2040 |
| Grmzm2g356653B | -----                                     | 2040 |
| GRMZM2G356653  | GTATAAGTGTGTCTCCGTCGGAGGAGAACATGCGGTACTC  | 2080 |
| Grmzm2g356653B | -----                                     | 2080 |
| GRMZM2G356653  | AACGTCATAATCCTTGCCATGCGCATTCACTTTGCAGTC   | 2120 |
| Grmzm2g356653B | -----                                     | 2120 |
| GRMZM2G356653  | AATTCCTCATTTATGATTGGCTTCACATGACATTACTTTT  | 2160 |
| Grmzm2g356653B | -----                                     | 2160 |
| GRMZM2G356653  | TGTATGGGTAGTCTTTGTGCTTCTGATGTTGTTTCTAGAA  | 2200 |
| Grmzm2g356653B | -----                                     | 2200 |

|                |                                             |      |
|----------------|---------------------------------------------|------|
| GRMZM2G356653  | TTATTAATAGATATATTTATAGAAGGAAAAAGCAAAGGTC    | 2240 |
| Grmzm2g356653B | -----                                       | 2240 |
| GRMZM2G356653  | AGGGCACTGGTACTATTTTCAGAAGGTATATTTGGTTTGTG   | 2280 |
| Grmzm2g356653B | -----                                       | 2280 |
| GRMZM2G356653  | CAGCTTCATTTGCAATGCATATATTTATTCTTCTTTACTA    | 2320 |
| Grmzm2g356653B | -----                                       | 2320 |
| GRMZM2G356653  | AAAAGAGACTCATCTTGTTAATTTAGTAATATATTTGTAT    | 2360 |
| Grmzm2g356653B | -----                                       | 2360 |
| GRMZM2G356653  | GTCCTGGGAAAAGATTGCTAGAGGAAAATTTGCTAAATTC    | 2400 |
| Grmzm2g356653B | -----                                       | 2400 |
| GRMZM2G356653  | TACAACCTACACATAACCTTTGTTTTCTTTTTTCATTTTCAGC | 2440 |
| Grmzm2g356653B | -----                                       | 2440 |
| GRMZM2G356653  | TATTGGTGAGTACTTACCGCTATGATGGACAAGACTTTTA    | 2480 |
| Grmzm2g356653B | -----                                       | 2480 |
| GRMZM2G356653  | TCATTTCTTTTTTAGCCAGATTGTGGTTAGATGTGAGATT    | 2520 |
| Grmzm2g356653B | -----                                       | 2520 |
| GRMZM2G356653  | ACTGTAGTTCATAGACCATAGCAGATGCTCGTAAGCAGAG    | 2560 |
| Grmzm2g356653B | -----                                       | 2560 |
| GRMZM2G356653  | GTTTCGCTGCTGTAAATGGATTGATTTCTTGCTTTTCCAGA   | 2600 |
| Grmzm2g356653B | -----                                       | 2600 |
| GRMZM2G356653  | ACGCATTGGCAAAGATCATGTGCTGTCTCAGCACAGCAC     | 2640 |
| Grmzm2g356653B | -----                                       | 2640 |
| GRMZM2G356653  | ACACGGTTTGCATCCATTCCTGTAGTGGACCAAGTACTG     | 2680 |
| Grmzm2g356653B | -----                                       | 2680 |
| GRMZM2G356653  | TAGTATGAAGAAGCGCGTGCATTTTCCCTGATTAATTTAG    | 2720 |
| Grmzm2g356653B | -----                                       | 2720 |
| GRMZM2G356653  | CTGGTTCAACTCTGTTGGGGTCCCAAGTCTTGCCATAAT     | 2760 |
| Grmzm2g356653B | -----                                       | 2760 |
| GRMZM2G356653  | TTGATGTAATTAACCTTCTTTAGACAATTGAGTACCTTTC    | 2800 |
| Grmzm2g356653B | -----                                       | 2800 |
| GRMZM2G356653  | TATGTGGATTTACATATCCCTTTGCCTTATAGTTTGGCAT    | 2840 |
| Grmzm2g356653B | -----                                       | 2840 |
| GRMZM2G356653  | ATTATTGCACTTCATGTTGACACACTTCTGATAGCATGTT    | 2880 |
| Grmzm2g356653B | -----                                       | 2880 |
| GRMZM2G356653  | TACCTTGGGATAAGATTTCTAATGTTTGCCAATATTGCCA    | 2920 |
| Grmzm2g356653B | -----                                       | 2920 |
| GRMZM2G356653  | AGTAAAATAAAATGTCAGTGGCTTCCTTGAACACCCAGAT    | 2960 |
| Grmzm2g356653B | -----                                       | 2960 |

|                |                                           |      |
|----------------|-------------------------------------------|------|
| GRMZM2G356653  | TATTTGCTACCTTCCTTTTGCATTACCACTATAAATTTTCA | 3000 |
| Grmzm2g356653B | -----t-----                               | 3000 |
| GRMZM2G356653  | AAGAAGGATGCTCTTTATCTTGTCTCTTTACAGGTTTGTG  | 3040 |
| Grmzm2g356653B | -----c-----c-----                         | 3040 |
| GRMZM2G356653  | TGGCGAAAGAAGATAGAGCGTGATGTATCTCAGGGACAGA  | 3080 |
| Grmzm2g356653B | -----                                     | 3080 |
| GRMZM2G356653  | AGGTGAATATTTCTGTTAAATCTGAGAAGAAGAAACAATA  | 3120 |
| Grmzm2g356653B | -----                                     | 3120 |
| GRMZM2G356653  | AGAAAGAATGGTACTATGAAACACTATATCTATTTCCATT  | 3160 |
| Grmzm2g356653B | -----                                     | 3160 |
| GRMZM2G356653  | GTTTATTAGTTGGAACAAAGCATATCATAGTCTTCTTACC  | 3200 |
| Grmzm2g356653B | -----                                     | 3200 |
| GRMZM2G356653  | TACTTCCAATGAATTAATAAGGTTTCATAGCATCATATGTA | 3240 |
| Grmzm2g356653B | -----                                     | 3240 |
| GRMZM2G356653  | TTATTTTATTTTCATCTATGCTTTTGTACTGTAGTGCACT  | 3280 |
| Grmzm2g356653B | -----                                     | 3280 |
| GRMZM2G356653  | GTACGCTTTGCTACCCAGAAAGCTTGTTATTTGGTCTTCT  | 3320 |
| Grmzm2g356653B | -----                                     | 3320 |
| GRMZM2G356653  | TCAAAAAGAAAATTGAAGATTATGCTTTTCTTGCAGCGCC  | 3360 |
| Grmzm2g356653B | -----g-----                               | 3360 |
| GRMZM2G356653  | TAATCGTTATAGTTGCTCTATCAAATGTAGGCTGAAATAG  | 3400 |
| Grmzm2g356653B | -----                                     | 3400 |
| GRMZM2G356653  | AAAAGGTTAAGAAAAGAAGAGAAGAAAGAGCTATTGAAAA  | 3440 |
| Grmzm2g356653B | -----                                     | 3440 |
| GRMZM2G356653  | GACACAGCATGAAGAGGAAATGGTTTGTATTTGACAATCA  | 3480 |
| Grmzm2g356653B | -----                                     | 3480 |
| GRMZM2G356653  | TAATCTCTTTTATAATAAATTTGTAAGTTTATGTCTACCG  | 3520 |
| Grmzm2g356653B | -----                                     | 3520 |
| GRMZM2G356653  | TTTATTACATTCAGATATTTTTTGCATTTGGAATTAATA   | 3560 |
| Grmzm2g356653B | -----                                     | 3560 |
| GRMZM2G356653  | CATATATTTGCCGTTTTGAAGACATTGCTAGCTAGAGAAA  | 3600 |
| Grmzm2g356653B | -----                                     | 3600 |
| GRMZM2G356653  | GAGCATGTGCCGAGTTTCAAGACTGGGAGAAGAAAGAGGA  | 3640 |
| Grmzm2g356653B | -----                                     | 3640 |
| GRMZM2G356653  | AGAGTCAATATCTTAAAATCTGACGAACACCATTCAATT   | 3680 |
| Grmzm2g356653B | -----                                     | 3680 |
| GRMZM2G356653  | TGTGTTGGAGTTAATATAGAATTGTTATTTATCTACCATT  | 3720 |
| Grmzm2g356653B | -----                                     | 3720 |

|                |                                           |      |
|----------------|-------------------------------------------|------|
| GRMZM2G356653  | TTCATTTTGGAGTGCAGTTTCATTTTGACCAAAGCAAGG   | 3760 |
| Grmzm2g356653B | -----                                     | 3760 |
| GRMZM2G356653  | TCAGGTCTGAGATCAGGTTGCGGGAGGGCGTACAAAGCC   | 3800 |
| Grmzm2g356653B | -----                                     | 3800 |
| GRMZM2G356653  | TATTGATGTTCTCCAAAAGAATCTTAATTTCTAGATGAA   | 3840 |
| Grmzm2g356653B | -----c-----                               | 3840 |
| GRMZM2G356653  | TTTGACATTGAGTTAAATGAACCCTATCTGGTGTTC AAGG | 3880 |
| Grmzm2g356653B | -----                                     | 3880 |
| GRMZM2G356653  | TGAGCATCATTTGCTCATCCTTATCTAAGTGT AAGTCGAC | 3920 |
| Grmzm2g356653B | -----                                     | 3920 |
| GRMZM2G356653  | TGAAAAAGCTTTGTCCCTGCAGCACCCCTACCTGTGTAAT  | 3960 |
| Grmzm2g356653B | -----                                     | 3960 |
| GRMZM2G356653  | TTTCTGTATGTTTTTTGAAGCCAGCTGTTGTATATTCTGA  | 4000 |
| Grmzm2g356653B | -----                                     | 4000 |
| GRMZM2G356653  | CACCATCGCACAGTACATCAAATGCATTTTATAACTTAGC  | 4040 |
| Grmzm2g356653B | -----                                     | 4040 |
| GRMZM2G356653  | AGTTCCTGAAATATGTGTTTTTTGCAATAAACTGGAGGAT  | 4080 |
| Grmzm2g356653B | -----                                     | 4080 |
| GRMZM2G356653  | GAGATGCACGAGGATGAAGGTTACCTCCTTTTCTGATTA   | 4120 |
| Grmzm2g356653B | -----                                     | 4120 |
| GRMZM2G356653  | CTCAATCAACTATGTTTCCAAGATACTGAAGTGATTTCTG  | 4160 |
| Grmzm2g356653B | -----                                     | 4160 |
| GRMZM2G356653  | ATATTATGTTTTATTTGTAGATGATAAACGATATTCATCT  | 4200 |
| Grmzm2g356653B | -----                                     | 4200 |
| GRMZM2G356653  | GAGCCTATACCTCAACAGACAGATAACCAATTTGAAGAGG  | 4240 |
| Grmzm2g356653B | -----                                     | 4240 |
| GRMZM2G356653  | AAGATGGATCCTTTTCTCCACAGCTAATGCATGGCAACGA  | 4280 |
| Grmzm2g356653B | -----                                     | 4280 |
| GRMZM2G356653  | AGATGAAGATGCAATTGATCCTGAAGAAGACAAAGATGAG  | 4320 |
| Grmzm2g356653B | -----                                     | 4320 |
| GRMZM2G356653  | CTGGTAGAGTTCATGTTAGGGCAAAAAGTCTACTGAGA    | 4360 |
| Grmzm2g356653B | -----                                     | 4360 |
| GRMZM2G356653  | TTTTCTTTCATTTAGACAAACTTTCAAGCTTGTGCAGGCC  | 4400 |
| Grmzm2g356653B | -----                                     | 4400 |
| GRMZM2G356653  | TCCCTGTGTGTCTTACCCTAAGAGAGGACATTGA        | 4434 |
| Grmzm2g356653B | -----                                     | 4434 |

## Predicted coding sequence and protein sequence of GRMZM2G356653B base on

### GRMZM2G356653

>GRMZM2G356653B\_coding\_sequence

```
ATGATTTTTTTCTTGTCAGGAACATCTCTGGTTATCTGGAGTTGGCGGTGGCCTTTTCATTCATGTTGCCTGCAC
TCATCCGGGTTGTAGCAATATCGGTCTCCAGTATTTTGTCAATAAATTTACTCTACTTCAAAAAACCTGACCTGGAA
AAAACACAGAGACTGAACAAGGGGTGGCGCAGGCTATTCTTCGTGGAATATCGATTTTAAGCGCGAACCCGC
CGCCGCCAGCCCGCCACCACGCTCTTCGCTAGCTCGCCACCCGCGCCGCCAGCCAGCCATCGCGCTACA
GACGCGCTGCCGGTACCCTCTCCCTCTCTGCCCGGAAGTTCTTGGGTAACCATCTCACTACAGCACCAGGTATAA
GTGTGTCTCCGTCGGAGGAGAACATGCGAATTATTAATAGATATATTTATAGAAGGAAAAAGCAAAGGTCAGGGC
ACTGGTACTATTTTCTCAGAAGCTATTGGTTTGTGTGGCGAAAGAAGATAGAGCGTGATGTATCTCAGGGACAGAAG
GCTGAAATAGAAAAGGTTAAGAAAAGAAGAGAAGAAAAGAGCTATTGAAAAGACACAGCATGAAGAGGAAATG
ACATTGCTAGCTAGAGAAAGAGCATGTGCCGAGTTTCAAGACTGGGAGAAGAAAAGAGGAAGAGTTTTCATTTG
ACCAAAGCAAGGTCAGGTCTGAGATCAGGTTGCGGGAGGGGCGTACAAAGCCTATTGATGTTCTCCAAAAGAA
TCTTAATTTCTCAGATGAATTTGACATTGAGTTAAATGAACCCTATCTGGTGTTCAAGGTGAGCATCATTTGCTCAT
CCTTATCTAAGTATGATAAACGATATTCATCTGAGCCTATACCTCAACAGACAGATAACCAATTTGAAGAGGAAGAT
GGATCCTTTTCTCCACAGCTAATGCATGGCAACGAAGATGAAGATGCAATTGATCCTGAAGAAGACAAAGATGA
GCTGGTAGAGTTCTATGTTAGGGCAAAAAGTTCTACTGAGATTTTCTTTCATTTAGACAAACTTTCAAGCTTGTGC
AGGCCTCCCTGTGTCTTACCCTAAGAGAGGACATTGA
```

> GRMZM2G356653B\_protein\_sequence

```
MIFFLSGTSLVIWSWRWPFHSWLPALIRVVAISVSSILSLNLLYFKKPDLEKTTETEQQVAQAILRGNIDFKREPAAASP
PTTLFASSPTAPPSPSRYRRAAGTLSLSARKFLGNHLTAPGISVSPSEENMRIINRYIYRRKKQRSQGHWYYFRSYWF
VWRKKIERDVSQGGQKAEIEKVKRRREERAIEKTQHEEMTLARERACAEFQDWEKKEEFHFDQSKVRSEIRLREG
RTKPIDVLQKNLNFSDFDIELNEPYLVFKVSIICSSLSKYDKRYSSEPIPQQTDNQFEEDGFSFQLMHGNEDEDAID
PEEDKDELVEFYVRAKSSTEIFFHLDKLSLRCRPPCVSYPKRGH*
```
